# Supplementary material for: Association between second-hand smoke exposure and lung cancer risk in never-smokers: a systematic review and meta-analysis
Source: PubMed Central journal article supplement — Eur Respir Rev. 2024 Nov 13;33(174):240077. doi: 10.1183/16000617.0077-2024 (PMC11558540; doi:10.1183/16000617.0077-2024), 2024-11-13
Supplement: ERR-0077-2024.SUPPLEMENT.pdf [file ERR-0077-2024.SUPPLEMENT.pdf]

| Description of Tables or Figure                                                                                                                                                                                                                                                                                                                                       | Page |
|-----------------------------------------------------------------------------------------------------------------------------------------------------------------------------------------------------------------------------------------------------------------------------------------------------------------------------------------------------------------------|------|
| <b>Supplementary Table 1.</b> List of 52 included meta-analyses, pooled-analyses, systematic reviews, and reports on the association between secondhand smoke (SHS) exposure and lung cancer risk.                                                                                                                                                                    | 2    |
| <b>Supplementary Table 2.</b> List of 136 publications retrieved from the umbrella review and excluded from the systematic review and meta-analysis, and corresponding reason of exclusion.                                                                                                                                                                           | 4    |
| <b>Supplementary Table 3.</b> List of 27 eligible publications excluded from the meta-analysis because of duplicated data from the same studies, and corresponding reason of exclusion.                                                                                                                                                                               | 8    |
| <b>Supplementary Table 4.</b> Main characteristics of the 71 case-control studies on the association between secondhand smoke (SHS) exposure and lung cancer risk included in the review, and corresponding information contributing to the meta-analysis.                                                                                                            | 9    |
| <b>Supplementary Table 5.</b> Main characteristics of the 27 cohort studies on the association between SHS exposure and lung cancer risk included in the review, and corresponding information contributing to the meta-analysis.                                                                                                                                     | 13   |
| <b>Supplementary Table 6.</b> List of publications for which data have been partially excluded from the meta-analysis and reason for exclusion.                                                                                                                                                                                                                       | 15   |
| <b>Supplementary Table 7.</b> Quality evaluation of the 71 case-control studies included in the present meta-analysis using the New-Castle Ottawa (NOS) scale.                                                                                                                                                                                                        | 16   |
| <b>Supplementary Table 8.</b> Quality evaluation of the 27 cohort studies included in the present meta-analysis using the New-Castle Ottawa (NOS) scale.                                                                                                                                                                                                              | 19   |
| <b>Supplementary Figure 1.</b> Forest plot of study-specific and pooled relative risk (RR) of lung cancer for secondhand smoke (SHS) exposure at home.                                                                                                                                                                                                                | 21   |
| <b>Supplementary Figure 2.</b> Forest plot of study-specific and pooled relative risk (RR) of lung cancer for secondhand smoke (SHS) exposure at work.                                                                                                                                                                                                                | 22   |
| <b>Supplementary Figure 3.</b> Forest plot of study-specific and pooled relative risk (RR) of lung cancer for secondhand smoke (SHS) exposure at home or at work.                                                                                                                                                                                                     | 23   |
| <b>Supplementary Figure 4.</b> Forest plot of study-specific and pooled relative risk (RR) of lung cancer for secondhand smoke (SHS) exposure in any environment.                                                                                                                                                                                                     | 24   |
| <b>Supplementary Figure 5.</b> Forest plot of study-specific and pooled relative risk (RR) of lung cancer for secondhand smoke (SHS) exposure from partner.                                                                                                                                                                                                           | 25   |
| <b>Supplementary Figure 6.</b> Forest plot of study-specific and pooled relative risk (RR) of lung cancer for secondhand smoke (SHS) exposure during childhood.                                                                                                                                                                                                       | 26   |
| <b>Supplementary Figure 7.</b> Forest plot of study-specific and pooled relative risk (RR) of lung adenocarcinoma for secondhand smoke (SHS) exposure.                                                                                                                                                                                                                | 27   |
| <b>Supplementary Figure 8.</b> Funnel plots of studies on the association between overall exposure (panel A), at home exposure (panel B), at work exposure (panel C), at home or at work exposure (panel D), exposure in any environment (panel E), exposure from partner (panel F), and childhood exposure (panel G) to secondhand smoke (SHS) and lung cancer risk. | 28   |
| <b>Supplementary Table 9.</b> Pooled relative risk (RR) and corresponding 95% confidence interval (CI) of lung cancer for never smokers exposed to secondhand smoke (SHS) versus non-exposed to SHS in studies with high quality (Newcastle Ottawa Scale $\geq 7$ ).                                                                                                  |      |
| <b>Supplementary Box 1.</b> Literature search strings for the update of the last available comprehensive review used in PubMed/MEDLINE and Embase.                                                                                                                                                                                                                    | 30   |
| <b>Supplementary Box 2.</b> Functions of the linear and spline models used to estimate the associations between secondhand smoke (SHS) duration (in years), intensity (in number of daily cigarettes), and pack-years of exposure and the risk of lung cancer.                                                                                                        | 31   |
| <b>References</b>                                                                                                                                                                                                                                                                                                                                                     | 32   |

**Supplementary Table 1.** List of 52 included meta-analyses, systematic reviews, and reports on the association between secondhand smoke (SHS) exposure and lung cancer risk.

| <b>First Author, Year [reference]</b> | <b>Type of publication</b> |
|---------------------------------------|----------------------------|
| Biggerstaff, 1994 [1]                 | Meta-analysis              |
| Blot, 1986 [2]                        | Pooled-analysis            |
| Boffetta, 2000 [3]                    | Meta-analysis              |
| Boffetta, 2002 [4]                    | Meta-analysis              |
| Brennan, 2004 [5]                     | Pooled-analysis            |
| Brown, 1999 [6]                       | Meta-analysis              |
| CalEPA, 2005 [7]                      | Report                     |
| Chappell, 1996 [8]                    | Meta-analysis              |
| Cheng, 2022 [9]                       | Pooled-analysis            |
| Dockery, 1997 [10]                    | Meta-analysis              |
| Du, 2020 [11]                         | Meta-analysis              |
| Faghani, 2022 [12]                    | Review                     |
| Fry, 2000 [13]                        | Meta-analysis              |
| Fry, 2001 [14]                        | Meta-analysis              |
| Gross, 1995 [15]                      | Review                     |
| Hackshaw, 1997 [16]                   | Meta-analysis              |
| Hauri, 2011 [17]                      | Meta-analysis              |
| Hori, 2016 [18]                       | Meta-analysis              |
| Huang, 2022 [19]                      | Meta-analysis              |
| IARC, 2004 [20]                       | Report                     |
| IARC, 2012 [21]                       | Report                     |
| Jayes, 2016 [22]                      | Review                     |
| Kim, 2014 [23]                        | Pooled-analysis            |
| Kim, 2015 [24]                        | Pooled-analysis            |
| Kim, 2018 [25]                        | Meta-analysis              |
| Law, 1996 [26]                        | Meta-analysis              |
| Lee, 2001 [27]                        | Meta-analysis              |
| Lee, 2002 [28]                        | Meta-analysis              |
| Lee, 2002 [29]                        | Meta-analysis              |
| Letzel, 1988 [30]                     | Meta-analysis              |
| LeVois, 1994 [31]                     | Review                     |
| Li, 2018 [32]                         | Meta-analysis              |
| Ni, 2018 [33]                         | Meta-analysis              |
| Okazaki, 2016 [34]                    | Review                     |
| Park, 2014 [35]                       | Meta-analysis              |
| Saracci, 1989 [36]                    | Meta-analysis              |
| SGR, 2001 [37]                        | Report                     |
| SGR, 2006 [38]                        | Report                     |
| Sheng, 2018 [39]                      | Meta-analysis              |
| Spitzer, 1990 [40]                    | Review                     |
| Stayner, 2007 [41]                    | Meta-analysis              |
| Taylor, 2001 [42]                     | Meta-analysis              |
| Taylor, 2007 [43]                     | Meta-analysis              |

|                    |               |
|--------------------|---------------|
| Tweedie, 1992 [44] | Meta-analysis |
| Tweedie, 1996 [45] | Meta-analysis |
| Wald, 1986 [46]    | Meta-analysis |
| Wang, 1997 [47]    | Meta-analysis |
| Wang, 2023 [48]    | Review        |
| Wells, 1998 [49]   | Meta-analysis |
| Zhang, 2022 [50]   | Review        |
| Zhao, 2006 [51]    | Meta-analysis |
| Zhong, 2000 [52]   | Meta-analysis |

CalEPA: California Environmental Protection Agency; IARC: International Agency for Research on Cancer; SGR: Surgeon General Report.

**Supplementary Table 2.** List of 137 publications retrieved from the umbrella review and excluded from the meta-analysis, and corresponding reason of exclusion.

| <b>First author, Year [reference]</b> | <b>Study design</b> | <b>Reason of exclusion</b>             |
|---------------------------------------|---------------------|----------------------------------------|
| Alavanja, 1994 [53]                   | CC                  | Book or symposium or thesis            |
| Asomaning, 2008 [54]                  | CC                  | No RR available                        |
| Behera, 2005 [55]                     | CC                  | Smokers included                       |
| Bennett, 1999 [56]                    | Case-series         | Case only                              |
| Bock, 2005 [57]                       | CC                  | No RR available                        |
| Boffetta, 1998 [58]                   | CC                  | Book or symposium or thesis            |
| Boffetta, 1999 [59]                   | CC                  | Letter                                 |
| Bonner, 2006 [60]                     | Case-series         | Case only                              |
| Brennan, 2000 [61]                    | CC                  | Letter                                 |
| Brownson, 1987 [62]                   | CC                  | Controls with cancer                   |
| Buffler, 1984 [63]                    | CC                  | Book or symposium or thesis            |
| Butler, 1988 [64]                     | CO                  | Book or symposium or thesis            |
| Chan, 1979 [65]                       | CC                  | No information on SHS                  |
| Chan, 1982 [66]                       | CC                  | Book or symposium or thesis            |
| Chen, 2009 [67]                       | CO                  | Book or symposium or thesis            |
| Chiou, 2005 [68]                      | CC                  | No information on SHS                  |
| Choi, 1989 [69]                       | CC                  | Not in English                         |
| Correa, 1984 [70]                     | CC                  | Book or symposium or thesis            |
| Dai, 1997 [71]                        | CC                  | Not in English                         |
| de Andrade, 2004 [72]                 | CO                  | No RR available                        |
| Du, 1993 [73]                         | CC                  | Book or symposium or thesis            |
| Du, 1995 [74]                         | CC                  | Book or symposium or thesis            |
| Fang, 2006 [75]                       | CC                  | Not in English                         |
| Franco-Marina, 2006 [76]              | CC                  | Smokers included                       |
| Garfinkel, 1985 [77]                  | CC                  | Controls with cancer or other diseases |
| Geng, 1988 [78]                       | CC                  | Book or symposium or thesis            |
| Ger, 1993 [79]                        | CC                  | Smokers included                       |
| Gillis, 1984 [80]                     | CC                  | No RR available                        |
| Guan, 2020 [81]                       | CC                  | Not in English                         |
| Hackshaw, 1997 [16]                   | MA                  | Not original estimates                 |
| He, 2011 [82]                         | CO                  | Not on lung cancer                     |
| Hirayama, 1981 [83]                   | CC                  | Letter                                 |
| Hirayama, 1983 [84]                   | CO                  | Letter                                 |
| Hirayama, 1984 [85]                   | CO                  | Book or symposium or thesis            |
| Hirayama, 1984 [86]                   | CO                  | Book or symposium or thesis            |
| Hirayama, 1987 [87]                   | CO                  | Book or symposium or thesis            |
| Hirayama, 1990 [88]                   | CO                  | Not in English                         |
| Hosgood, 2012 [89]                    | CC                  | Smokers included                       |
| Huang, 2011 [90]                      | CC                  | Not in English                         |

|                        |             |                             |
|------------------------|-------------|-----------------------------|
| Humble, 1987 [91]      | CC          | 95% CIs not computable      |
| Inoue, 1988 [92]       | CC          | Book or symposium or thesis |
| Izumi, 2004 [93]       | CO          | All cancer sites combined   |
| Jang, 2015 [94]        | Case-series | Case only                   |
| Jee, 2004 [95]         | CO          | No information on SHS       |
| Jiang, 2010 [96]       | CC          | Not in English              |
| Jin, 2009 [97]         | CC          | No information on SHS       |
| Jo, 2008 [98]          | CC          | No information on SHS       |
| Jockel, 1991 [99]      | CC          | Not in English              |
| Jou, 2009 [100]        | CC          | No RR available             |
| Kabat, 1984 [101]      | CC          | No RR available             |
| Kabat, 1990 [102]      | CC          | Book or symposium or thesis |
| Katada, 1998 [103]     | CC          | Not in English              |
| Kim, 2014 [104]        | CC          | No RR available             |
| Kiyohara, 2003 [105]   | CC          | Wrong reference group       |
| Kiyohara, 2010 [106]   | CC          | No RR available             |
| Kleinerman, 2000 [107] | CC          | Abstract only               |
| Kleinerman, 2002 [108] | CC          | No information on SHS       |
| Ko, 2000 [109]         | CC          | No RR available             |
| Koo, 1983 [110]        | CC          | Not in English              |
| Koo, 1984 [111]        | CC          | Not in English              |
| Koo, 1985 [112]        | CC          | Not original estimates      |
| Lam, 1985 [113]        | CC          | Book or symposium or thesis |
| Lam, 1988 [114]        | CC          | Book or symposium or thesis |
| Lan, 2004 [115]        | CC          | No information on SHS       |
| Lan, 2008 [116]        | CC          | Smokers included            |
| Layard, 1995 [117]     | CC          | Not on lung cancer          |
| Lee, 1984 [118]        | CC          | Book or symposium or thesis |
| Lee, 1988 [119]        | NA          | Book or symposium or thesis |
| Lee, 2010 [120]        | Case-series | Case only                   |
| Li, 2000 [121]         | CC          | Not in English              |
| Li, 2005 [122]         | CC          | Not in English              |
| Li, 2008 [123]         | CC          | Not in English              |
| Li, 2010 [124]         | CC          | No RR available             |
| Li, 2011 [125]         | CC          | Not in English              |
| Li, 2020 [126]         | CC          | Not in English              |
| Liang, 2009 [127]      | CC          | Wrong reference group       |
| Liang, 2009 [128]      | CC          | Not original estimates      |
| Lin, 1994 [129]        | CC          | Not in English              |
| Lin, 1996 [130]        | CC          | Not in English              |
| Lin, 2010 [131]        | CC          | Book or symposium or thesis |
| Liu, 1990 [132]        | CC          | Not in English              |
| Liu, 2001 [133]        | CC          | Not in English              |

|                          |         |                                        |
|--------------------------|---------|----------------------------------------|
| Liu, 2010 [134]          | CC      | Not in English                         |
| Liu, 2015 [135]          | CC      | Not in English                         |
| Luo, 1996 [136]          | CC      | Smokers included                       |
| Lv, 2003 [137]           | CC      | Not in English                         |
| Ma, 2021 [138]           | CC      | Not in English                         |
| Mu, 2021 [139]           | CC      | Not in English                         |
| Pan, 2014 [140]          | CC      | Not in English                         |
| Pan, 2018 [141]          | CC      | No RR available                        |
| Phukan, 2014 [142]       | CC      | Smokers included                       |
| Ren, 2015 [143]          | CC      | No RR available                        |
| Reynolds, 1996 [144]     | Comment | Letter                                 |
| Sandler, 1985 [145]      | CC      | Smokers included                       |
| Sandler, 1985 [146]      | CC      | Smokers included                       |
| Schwartz, 2007 [147]     | CC      | No RR available                        |
| Seow, 2002 [148]         | CC      | No RR available                        |
| Shen, 1996 [149]         | CC      | No RR available                        |
| Shen, 2014 [150]         | CC      | No RR available                        |
| Shi, 2005 [151]          | CC      | Not in English                         |
| Shi, 2006 [152]          | CC      | Not in English                         |
| Shimizu, 1988 [153]      | CC      | Controls with cancer or other diseases |
| Shiraishi, 2009 [154]    | CC      | No RR available                        |
| Sobue, 1990 [155]        | CC      | Not in English                         |
| Song, 1999 [156]         | CC      | Not in English                         |
| Stayner, 2007 [41]       | MA      | Not original estimates                 |
| Su, 2013 [157]           | CC      | Not in English                         |
| Sun, 1995 [158]          | CC      | Not in English                         |
| Sun, 1996 [159]          | CC      | Book or symposium or thesis            |
| Taylor, 2007 [43]        | MA      | Not original estimates                 |
| Trichopoulos, 1983 [160] | CC      | Letter                                 |
| Tse, 2011 [161]          | CC      | Smokers included                       |
| Varela, 1987 [162]       | CC      | Book or symposium or thesis            |
| Wang, 1995 [163]         | CC      | Abstract only                          |
| Wang, 1996 [164]         | CC      | Not in English                         |
| Wang, 1996 [165]         | CC      | Abstract only                          |
| Wang, 2002 [166]         | CC      | Not in English                         |
| Wenzlaff, 2005 [167]     | CC      | No RR available                        |
| Wenzlaff, 2005 [168]     | CC      | No RR available                        |
| Wu, 2009 [169]           | CC      | No RR available                        |
| Wu-Williams, 1990 [170]  | CC      | Not original estimates                 |
| Xiang, 2003 [171]        | CC      | Not in English                         |
| Xu, 1989 [172]           | CC      | Smokers included                       |
| Xu, 2001 [173]           | CC      | No RR available                        |
| Xue, 2013 [174]          | CC      | No RR available                        |

|                     |    |                        |
|---------------------|----|------------------------|
| Yoon, 2008 [175]    | CC | No RR available        |
| Yu, 1996 [176]      | CC | Abstract only          |
| Yu, 2015 [177]      | CC | Not in English         |
| Zaridze, 1994 [178] | CC | Not in English         |
| Zaridze, 1995 [179] | CC | Not in English         |
| Zaridze, 1998 [180] | CC | Controls with cancer   |
| Zhao, 2013 [181]    | CC | Not in English         |
| Zheng, 1997 [182]   | CC | Not in English         |
| Zhong, 1995 [183]   | CC | Not in English         |
| Zhong, 2000 [52]    | MA | Not original estimates |
| Zhou, 2000 [184]    | CC | Not in English         |
| Ziegler, 1984 [185] | CC | No RR available        |

CC: case-control study; CO: cohort study; CI: confidence interval; NA: not available; MA: meta-analysis; RR: relative-risk.

**Supplementary Table 3.** List of 27 eligible publications excluded from the meta-analysis because of duplicated data from the same studies, and corresponding reason of exclusion.

| <b>First author, Year [reference]</b> | <b>Study design</b> | <b>Reason of exclusion</b>                           |
|---------------------------------------|---------------------|------------------------------------------------------|
| Chuang, 2011 [186]                    | CO                  | Included in Vineis, 2007 [187]                       |
| Fang, 2016 [188]                      | CC                  | Included in Qu, 2019 [189] and Ren, 2013 [190]       |
| Fontham, 1991 [191]                   | CC                  | Majority of subjects included in Fontham, 1994 [192] |
| Fowke, 2011 [193]                     | NCC                 | Included in Weiss, 2008 [194]                        |
| Garfinkel, 1981 [195]                 | CO                  | Included in Enstrom, 2003 [196]                      |
| Gorlova, 2008 [197]                   | CC                  | Included in Spitz, 2011 [198]                        |
| Gorlova, 2011 [199]                   | CC                  | Included in Spitz, 2011 [198]                        |
| He, 2017 [200]                        | CC                  | Same cases of Zhuang, 2022 [201]                     |
| Hirayama, 1981 [202]                  | CO                  | Included in Hirayama, 1984 [203]                     |
| Hosseini, 2009 [204]                  | CC                  | Included in Masjedi, 2013 [205]                      |
| Kabat, 1996 [206]                     | CC                  | Included in Kabat, 1995 [207]                        |
| Ko, 1997 [208]                        | CC                  | Included in Lee, 2000 [209]                          |
| Kreuzer, 2002 [210]                   | CC                  | Included in Kreuzer, 2000 [211]                      |
| Kubik, 2001 [212]                     | CC                  | Included in Zatloukal, 2003 [213]                    |
| Kubik, 2002 [214]                     | CC                  | Included in Zatloukal, 2003 [213]                    |
| Lo, 2010 [215]                        | CC                  | Included in Lo, 2013 [216] and Lo, 2011 [217]        |
| Nyberg, 1998 [218]                    | CC                  | Included in Boffetta, 1998 [219]                     |
| Olivo-Marston, 2009 [220]             | CC                  | Included in Spitz, 2011 [198] and Kim, 2014 [23]     |
| Schwartz, 1996 [221]                  | CC                  | Included in Kim, 2014 [23]                           |
| Torres-Durán, 2015 [222]              | CC                  | Included in Tubío-Pérez, 2022 [223]                  |
| Trichopoulos, 1981 [224]              | CC                  | Included in Kalandidi, 1990 [225]                    |
| Vineis, 2005 [226]                    | NCC                 | Included in Vineis, 2007 [187]                       |
| Wang, 1994 [227]                      | CC                  | Included in Wu-Williams, 1990 [228]                  |
| Yang, 2008 [229]                      | CC                  | Included in Spitz, 2011 [198]                        |
| Yang, 2019 [230]                      | CC                  | Included in Qu, 2019 [189] and Ren, 2013 [190]       |
| Yu, 2006 [231]                        | CC                  | Included in Wang, 2009 [232]                         |
| Zhong, 1999 [233]                     | CC                  | Included in Zhong, 1999 [234]                        |

CC: case-control study; CO: cohort study, NCC: nested case-control.



**Supplementary Table 4.** Main characteristics of the 71 case-control studies on the association between secondhand smoke (SHS) exposure and lung cancer risk included in the review, and corresponding information contributing to the meta-analysis.

| First Author, Year [reference] | Country                                                                 | Type of controls | N. of cases       | N. of controls    | Type of exposure |                |      |           |                        |           | Dose-response  |                |            | Subtypes       |    |    |      |       |
|--------------------------------|-------------------------------------------------------------------------|------------------|-------------------|-------------------|------------------|----------------|------|-----------|------------------------|-----------|----------------|----------------|------------|----------------|----|----|------|-------|
|                                |                                                                         |                  |                   |                   | Partner          | Home           | Work | Home-work | Non-specified settings | Childhood | Intensity      | Duration       | Pack-years | Adenocarcinoma | SQ | LC | SCLC | NSCLC |
| Akiba, 1986 [235]              | Japan                                                                   | P                | 113               | 380               | X <sup>b</sup>   | X <sup>b</sup> |      |           |                        |           | X <sup>b</sup> | X <sup>b</sup> |            |                |    |    |      |       |
| Al-Zoughool, 2013 [236]        | Canada                                                                  | P                | 44                | 436               | X                | X              |      |           | X                      | X         |                |                | X          |                |    |    |      |       |
| Boffetta, 1998 [219]           | Europe                                                                  | M                | 650 <sup>a</sup>  | 1542 <sup>a</sup> | X                | X              | X    | X         |                        | X         | X              | X              | X          | X              | X  |    | X    | O     |
| Boffetta, 1999 [237]           | Europe                                                                  | M                | 70                | 178               | X                | X              | X    | X         |                        | X         |                | X              | X          | X              |    |    |      |       |
| Brennan, 2004 [5]              | USA, Germany, Italy, Sweden, United Kingdom, France, Spain and Portugal | M                | 1263 <sup>a</sup> | 2740 <sup>a</sup> |                  |                |      |           |                        |           |                | X              |            |                |    |    |      |       |
| Brenner, 2010 [238]            | Canada                                                                  | M                | 156               | 466               |                  | X              | X    | X         |                        | X         |                | X              |            |                |    |    |      |       |
| Brownson, 1992 [239]           | USA                                                                     | P                | 431               | 1166              | X                | X              |      |           |                        | X         |                |                | X          |                |    |    |      |       |
| Chan-Yeung, 2003 [240]         | China                                                                   | H                | 158               | 209               |                  | X              |      | X         | X                      |           |                |                |            |                |    |    |      |       |
| Cheng, 2022 (a) [241]          | Australia                                                               | P                | 58                | 1316              |                  |                |      |           | O                      | O         |                |                |            |                |    |    |      |       |
| Correa, 1983 [242]             | USA                                                                     | H                | 30                | 313               | O                | O              |      |           |                        |           |                |                | O          |                |    |    |      |       |
| Dalager, 1986 [243]            | USA                                                                     | M                | 99                | 736               | X                | X              |      |           |                        |           | X              | X              | X          | X              |    |    |      | X     |
| Du, 1996 [244]                 | China                                                                   | P                | 75 <sup>a</sup>   | 128 <sup>a</sup>  |                  |                |      |           |                        |           | O              |                |            |                |    |    |      |       |
| Fontham, 1994 [192]            | USA                                                                     | P                | 653 <sup>a</sup>  | 1253 <sup>a</sup> | X                | X              | X    |           | O                      | X         |                |                | X          | X              |    |    |      | X     |
| Galeone, 2008 [245]            | China                                                                   | H                | 60                | 216               |                  |                |      | X         |                        |           |                |                |            |                |    |    |      |       |
| Gallegos-Arreola, 2008 [246]   | Mexico                                                                  | P                | 32                | 138               |                  |                |      |           | X                      |           |                |                |            |                |    |    |      |       |

|                       |                                                                              |   |                  |                   |   |   |   |   |   |   |   |   |   |   |   |   |   |   |
|-----------------------|------------------------------------------------------------------------------|---|------------------|-------------------|---|---|---|---|---|---|---|---|---|---|---|---|---|---|
| Gao, 1987 [247]       | China                                                                        | P | 246              | 375               | X | X |   |   |   | X |   | X |   |   |   |   |   |   |
| Gorlova, 2006 [248]   | USA                                                                          | H | 280 <sup>a</sup> | 242 <sup>a</sup>  |   | O | O | O |   |   |   |   |   |   |   |   |   |   |
| Han, 2017 [249]       | China                                                                        | P | 99               | 99                |   |   | X |   |   |   |   |   | X |   |   |   | X |   |
| Janerich, 1990 [250]  | USA                                                                          | P | 191              | 191               | X | X |   |   | X |   |   | X |   |   |   |   |   |   |
| Jockel, 1998 [251]    | Germany                                                                      | P | 55               | 160               | X | X |   |   | O |   |   |   |   |   |   |   |   |   |
| Johnson, 2001 [252]   | Canada                                                                       | P | 71               | 761               |   | O | O | X |   | O |   | X |   |   |   |   |   |   |
| Kabat, 1995 [207]     | USA                                                                          | H | 110              | 304               | X | X | X |   |   | X | X |   |   |   |   |   |   |   |
| Kalandidi, 1990 [225] | Greece                                                                       | H | 91               | 120               | X | X | X |   |   |   |   |   | X |   |   |   | X |   |
| Kim, 2015 [24]        | North America,<br>Europe, Asia/Oceania                                       | M | 170 <sup>a</sup> | 3035 <sup>a</sup> |   |   |   |   |   |   |   |   |   |   |   |   |   |   |
| Kim, 2014 [25]        | North America,<br>Europe, Asia/Oceania                                       | M | 2504             | 7276              |   | X | X | X | X | X |   | X |   | X | X | X | X | O |
| Koo, 1987 [253]       | China                                                                        | P | 88               | 137               | X | O |   |   | X | O | X | X |   |   |   |   |   | O |
| Kreuzer, 2001 [254]   | Germany                                                                      | P | 58 <sup>a</sup>  | 803 <sup>a</sup>  |   |   |   |   |   |   |   |   |   |   |   |   |   |   |
| Kreuzer, 2000 [211]   | Germany                                                                      | P | 292              | 1338              | X | X | X |   | X | X |   |   | X | X |   |   |   | X |
| Lam, 1987 [255]       | China                                                                        | P | 199              | 335               | X | X |   |   |   | X |   |   | X | X | X | X | X | O |
| Lee, 2000 [209]       | Taiwan                                                                       | H | 268              | 445               | O | X | O | X |   | X |   |   | O |   |   |   |   |   |
| Lee, 1986 [256]       | UK                                                                           | H | 47               | 96                | X | O | O |   |   |   |   |   |   |   |   |   |   |   |
| Lei, 1996 [257]       | China                                                                        | P | 75               | 128               | X | X |   |   |   | X | X |   |   |   |   |   |   |   |
| Li, 2016 [258]        | China                                                                        | P | 103 <sup>a</sup> | 375 <sup>a</sup>  |   |   |   |   |   |   |   |   |   | X |   |   |   | X |
| Liang, 2019 [259]     | China                                                                        | P | 1086             | 2172              |   | X | X |   |   |   |   |   |   |   |   |   |   |   |
| Lin, 2012 [260]       | China                                                                        | P | 226 <sup>a</sup> | 269               |   |   |   |   |   |   |   | X |   |   |   |   |   |   |
| Liu, 1993 [261]       | China                                                                        | H | 38               | 69                | X | X |   |   |   | X |   |   |   |   |   |   |   |   |
| Liu, 1991 [262]       | China                                                                        | P | -                | -                 |   | X |   |   |   |   |   |   |   |   |   |   |   |   |
| Liu, 2020 [263]       | China                                                                        | P | 388              | 1574              |   |   |   |   | X |   |   |   |   |   |   |   |   |   |
| Lo, 2013 [216]        | Taiwan                                                                       | H | 1540             | 1540              | X | X | X | X |   |   |   |   |   |   |   |   |   |   |
| Lo, 2011 [217]        | Taiwan                                                                       | H | 462 <sup>a</sup> | 462 <sup>a</sup>  |   |   |   |   | O |   |   | O |   | O |   |   |   |   |
| Malats, 2000 [264]    | Sweden, Germany,<br>France, Italy, Russia,<br>Romania, Poland, and<br>Brazil | M | 122              | 121               | X | X |   | X |   |   |   |   |   |   |   |   |   |   |
| Masjedi, 2013 [205]   | Iran                                                                         | M | 81               | 289               |   |   |   |   | X |   |   |   |   |   |   |   |   |   |

|                          |                |   |                  |                  |           |           |           |           |           |           |           |           |           |           |          |          |          |           |
|--------------------------|----------------|---|------------------|------------------|-----------|-----------|-----------|-----------|-----------|-----------|-----------|-----------|-----------|-----------|----------|----------|----------|-----------|
| McGhee, 2005 [265]       | China          | P | 324              | 663              |           | X         |           |           |           |           |           |           |           |           |          |          |          |           |
| Mu, 2013 [266]           | China          | P | 179              | 285              |           | X         | O         | O         |           |           |           |           |           |           |          |          |          |           |
| Nyberg, 1998 [267]       | Sweden         | P | 124              | 235              | X         | X         | X         | X         |           | X         | X         | X         | X         |           |          |          |          |           |
| Qu, 2019 [189]           | China          | H | 345              | 351              |           |           |           |           | X         |           |           |           |           |           |          |          |          |           |
| Rachtan, 2002 [268]      | Poland         | P | 54               | 251              |           | X         |           |           |           | X         |           |           |           |           | X        |          | X        | X         |
| Rapiti, 1999 [269]       | India          | M | 58               | 123              | X         | X         |           |           |           | X         |           |           |           |           |          |          |          |           |
| Ren, 2013 [190]          | China          | H | 764              | 983              |           |           |           |           | X         |           |           |           |           | X         |          |          |          | X         |
| Seki, 2013 [270]         | Japan          | H | 362              | 2410             | X         | X         |           |           |           |           |           |           |           | X         | X        |          | X        | O         |
| Shen, 1998 [271]         | China          | P | 70               | 70               |           |           |           |           | X         |           | X         | X         |           | X         |          |          |          |           |
| Sobue, 1990 [272]        | Japan          | H | 144              | 731              | X         | X         |           |           |           | X         |           |           |           |           |          |          |          |           |
| Spitz, 2011 [198]        | USA            | M | 451 <sup>a</sup> | 708 <sup>a</sup> |           |           |           |           |           |           |           |           |           |           |          |          |          | X         |
| Stockwell, 1992 [273]    | USA            | P | 210              | 301              | X         | X         |           |           |           | X         |           |           |           | X         |          |          |          | X         |
| Svensson, 1989 [274]     | Sweden         | M | 34               | 174              |           | X         |           | X         |           | X         |           |           |           |           |          |          |          |           |
| Torres-Durán, 2014 [275] | Spain          | H | 177 <sup>a</sup> | 272 <sup>a</sup> |           |           |           |           |           |           |           | O         |           |           |          |          |          |           |
| Tse, 2009 [276]          | China          | P | 132              | 536              |           | X         | X         | X         |           |           |           | X         | X         | X         |          |          |          | X         |
| Tubío-Pérez, 2022 [223]  | Spain          | H | 457              | 631              |           | X         |           |           |           |           |           |           |           |           |          |          |          |           |
| Wang, 2000 [277]         | China          | P | 228              | 521              |           | X         |           |           |           | X         |           |           |           | X         |          |          |          |           |
| Wang, 2009 [232]         | China          | P | 213              | 292              |           |           |           | X         |           |           |           |           |           |           |          |          |          |           |
| Wang, 1996 (a) [278]     | China          | P | 135              | 135              | X         | X         | X         |           | X         | X         | X         | X         |           |           |          |          |          |           |
| Wang, 1996 (b) [279]     | China          | H | 83               | -                |           |           |           | X         |           |           |           |           |           |           |          |          |          |           |
| Wu, 1985 [280]           | USA            | P | 31               | 92               | X         | X         | X         |           |           | X         |           |           |           | X         |          |          |          | X         |
| Wu-Williams, 1990 [228]  | China          | P | 417              | 602              | X         | X         | X         |           |           |           |           |           |           |           |          |          |          |           |
| Yang, 2015 [281]         | China          | P | 735              | 914              | X         | X         |           |           | X         | X         |           |           |           |           |          |          |          |           |
| Yin, 2014 (a) [282]      | China          | H | 154 <sup>a</sup> | 170 <sup>a</sup> |           |           |           |           |           |           |           |           |           | X         |          |          |          |           |
| Yin, 2014 (b) [283]      | China          | H | 306              | 318              |           |           |           |           | X         |           |           |           |           |           |          |          |          |           |
| Zatloukal, 2003 [213]    | Czech Republic | P | 84               | 889              |           | X         |           | X         |           | X         |           |           |           | X         |          |          |          | X         |
| Zhong, 1999 [234]        | China          | P | 504              | 601              | X         | X         | X         | O         |           | X         | X         | X         |           | X         |          |          |          | X         |
| Zhou, 2000 [284]         | China          | P | 72 <sup>a</sup>  | 72 <sup>a</sup>  |           |           |           |           |           |           |           |           |           | X         |          |          |          | X         |
| Zhuang, 2022 [201]       | China          | P | 623              | 985              |           | O         | O         | X         |           |           |           |           |           | X         | X        |          |          | O         |
| <b>TOTAL (1983-2022)</b> |                |   | <b>15,647</b>    | <b>36,804</b>    | <b>32</b> | <b>48</b> | <b>23</b> | <b>20</b> | <b>18</b> | <b>27</b> | <b>13</b> | <b>19</b> | <b>13</b> | <b>21</b> | <b>7</b> | <b>2</b> | <b>5</b> | <b>24</b> |

H: hospital; LC: large cell carcinoma; M: mixed; NSCLC: non-small-cell lung cancer; O symbol indicates that estimates were derived from the information provided in the original study publication; P: population; SCLC: small-cell lung cancer; SQ: squamous cell carcinoma; X symbol indicates that estimates were provided in the original study publication. <sup>a</sup> Number of subjects not included in the total, because overall estimates are already included in other articles; <sup>b</sup> IC recomputed.

**Supplementary Table 5.** Main characteristics of the 27 cohort studies on the association between secondhand smoke (SHS) exposure and lung cancer risk included in the review, and corresponding information contributing to the meta-analysis.

| First Author, Year [reference] | Country (cohort name)                                     | Endpoint | N. of cases | Type of exposure |      |      |           |                        |           | Dose-response |          |            | Subtypes       |    |    |      |       |   |
|--------------------------------|-----------------------------------------------------------|----------|-------------|------------------|------|------|-----------|------------------------|-----------|---------------|----------|------------|----------------|----|----|------|-------|---|
|                                |                                                           |          |             | Partner          | Home | Work | Home-work | Non-specified settings | Childhood | Intensity     | Duration | Pack-years | Adenocarcinoma | SQ | LC | SCLC | NSCLC |   |
| Abdel-Rahman, 2020 [285]       | USA (PLCO)                                                | IM       | 136         |                  | O    | O    | X         |                        | X         |               |          |            |                |    |    |      |       |   |
| Cardenas, 1997 [286]           | USA (CPS-II)                                              | M        | 247         | X                | X    |      |           |                        |           | X             | X        | X          |                |    |    |      |       |   |
| Cheng, 2022 (a) [9]            | Australia (45 and Up Study)                               | I        | 226         |                  |      |      |           | O                      |           |               |          |            |                |    |    |      |       |   |
| Cheng, 2022 (b) [241]          | China (China Kadoorie Biobank)                            | M        | 979         |                  | X    |      |           | X                      |           |               | O        |            |                |    |    |      |       |   |
| de Waard, 1995 [287]           | Netherlands (Cancer Registry)                             | I        | 23          |                  |      |      |           | O                      |           |               |          |            |                |    |    |      |       |   |
| Enstrom, 2003 [196]            | USA (CPS I)                                               | M        | 365         | X                | X    |      |           |                        |           |               |          |            |                |    |    |      |       |   |
| Erhunmwunsee, 2022 [288]       | USA (Black Women's Health Study)                          | I        | 77          |                  | X    | X    |           |                        |           |               |          |            |                |    |    |      |       | X |
| Hansen, 2021 [289]             | Norway (NOWAC)                                            | I        | 96          |                  | X    |      |           |                        |           |               |          |            |                |    |    |      |       |   |
| He, 2012 [290]                 | China (4th Military Medical University teaching hospital) | M        | 16          |                  | X    | X    | X         |                        |           |               |          |            |                |    |    |      |       |   |
| Hill, 2007 [291]               | New Zealand (New Zealand Census Mortality Study)          | M        | 309         |                  | X    |      |           |                        |           |               |          |            |                |    |    |      |       |   |
| Hirayama, 1984 [203]           | Japan (29 Health Center Districts in Japan)               | M        | 264         | O                | O    |      |           |                        |           | O             |          |            |                |    |    |      |       |   |
| Hole, 1989 [292]               | UK (Renfrew and Paisley)                                  | M        | 9           |                  | X    |      |           |                        |           |               |          |            |                |    |    |      |       |   |
| Jee, 1999 [293]                | Korea (KMIC)                                              | I        | 79          | X                | X    |      |           |                        |           | X             | X        |            |                |    |    |      |       |   |

|                          |                                                                        |   |             |          |           |          |          |          |          |          |          |          |          |          |          |          |          |
|--------------------------|------------------------------------------------------------------------|---|-------------|----------|-----------|----------|----------|----------|----------|----------|----------|----------|----------|----------|----------|----------|----------|
| Kurahashi, 2008 [294]    | Japan (JPHC Study (I and II))                                          | I | 109         | X        | X         | X        | X        | X        | X        | X        |          | X        | X        |          |          |          | X        |
| Li, 2020 [295]           | China (Qibao urban-rural integration town)                             | I | 152         |          |           |          | X        |          |          |          |          |          |          |          |          |          |          |
| Miller, 1994 [296]       | USA (ECSSH)                                                            | M | 28          |          |           |          |          | X        |          |          |          |          |          |          |          |          |          |
| Nishino, 2001 [297]      | Japan (two towns in Miyagi Prefecture)                                 | I | 24          | X        | X         |          |          |          |          |          |          |          |          |          |          |          |          |
| Ozasa, 2007 [298]        | Japan (JACC study)                                                     | M | 231         |          | X         |          |          |          | X        |          |          |          |          |          |          |          |          |
| Pershagen, 1987 [299]    | Sweden (National Census of Sweden and the "old" Swedish twin register) | M | 92          | X        | X         |          |          |          |          |          |          |          |          |          |          |          |          |
| Pirie, 2016 [300]        | UK (Million Women Study)                                               | I | 1469        | X        | X         |          |          |          | X        |          |          |          | X        |          |          |          | X        |
| Speizer, 1999 [301]      | USA (Nurses' Health)                                                   | I | 58          |          |           |          |          | X        |          |          |          |          |          |          |          |          |          |
| Veglia, 2007 [302]       | Europe (EPIC)                                                          | I | 752         |          |           |          |          |          |          |          |          |          |          |          |          |          |          |
| Vineis, 2007 [187]       | Europe (EPIC)                                                          | I | -           |          | X         | X        | X        |          | X        |          |          |          |          |          |          |          |          |
| Wang, 2015 [303]         | USA (WHI-OS)                                                           | I | 152         |          | X         | X        | X        |          | X        |          | X        |          |          |          |          |          |          |
| Weiss, 2008 [194]        | China (Shanghai Women's Health)                                        | I | 198         |          |           |          | X        |          |          |          |          |          |          |          |          |          |          |
| Wen, 2006 [304]          | China (Shanghai Women's Health)                                        | M | -           | X        | X         | X        |          | X        | X        |          | X        | X        |          |          |          |          |          |
| Zhang, 2022 [305]        | USA (NHANES study)                                                     | M | -           |          |           |          | O        |          |          | X        |          |          |          |          |          |          |          |
| <b>TOTAL (1984-2022)</b> |                                                                        |   | <b>6091</b> | <b>9</b> | <b>19</b> | <b>7</b> | <b>8</b> | <b>7</b> | <b>7</b> | <b>5</b> | <b>5</b> | <b>3</b> | <b>2</b> | <b>0</b> | <b>0</b> | <b>0</b> | <b>3</b> |

CPS: American Cancer Society's Cancer Prevention Study; ECSSH: Erie County Study on Smoking and Health; EPIC: European Prospective Investigation into Cancer and Nutrition; I: Incidence; JACC: Japan Collaborative Cohort Study for Evaluation of Cancer Risk; JPHC: Japan Public Health Center-based prospective Study; KMIC: Korea Medical Insurance Corporation; LC: large cell carcinoma; M: Mortality; NHANES: National Health and Nutrition Examination Survey; NOWAC: Norwegian Women and Cancer Study; NSCLC: non-small-cell lung cancer; PLCO: The Prostate, Lung, Colorectal and Ovarian Cancer Screening Trial; SCLC: small-cell lung cancer; SQ: squamous cell carcinoma; WHI-OS: Women's Health Initiative Observational Study.

Note that Cheng, 2022 (a) [9] is reported in both Supplementary Table 1 and Supplementary Table 2 because it is a pooled analysis considering both a case-control study and a cohort study.

**Supplementary Table 6.** List of publications for which data have been partially excluded from the meta-analysis and reason for exclusion.

| <b>First author, Year [reference]</b>               | <b>Excluded estimates</b>                                                                                                      | <b>Reason</b>                                            |
|-----------------------------------------------------|--------------------------------------------------------------------------------------------------------------------------------|----------------------------------------------------------|
| Boffetta, 1998 [219]                                | Duration                                                                                                                       | Included in Brennan, 2004 [5]                            |
| Brennan, 2004 [5]                                   | Exposure from partner, exposure at workplace, exposure in non-specified settings                                               | Included in Boffetta, 1998 [219] and Fontham, 1994 [192] |
| Du, 1996 [244]                                      | Duration, exposure from partner                                                                                                | Included in Lei, 1996 [257]                              |
| Fontham, 1994 [192]                                 | Duration                                                                                                                       | Included in Brennan, 2004 [5]                            |
| Kim, 2015 [24]                                      | Duration, exposure at home, exposure at workplace, exposure at home or at workplace, exposure during childhood, adenocarcinoma | Included in Kim, 2014 [23]                               |
| Li, 2016 [258]                                      | Exposure at home or at workplace, adenocarcinoma                                                                               | Included in Tse, 2009 [276]                              |
| Lin, 2012 [260]                                     | Exposure at home or at workplace                                                                                               | Included in Zhuang, 2022 [201]                           |
| Spitz, 2011 [198]                                   | Results from Mayo Clinic Study                                                                                                 | Partially included in Kim, 2014 [23]                     |
| Torres-Durán, 2014 [275]                            | Exposure at home                                                                                                               | Included in Tubío-Pérez, 2022 [223]                      |
| Veglia, 2007 [302]                                  | Exposure at workplace                                                                                                          | Included in Vineis, 2007 [187]                           |
| Wen, 2006 [304]                                     | Exposure at home or at workplace                                                                                               | Included in Weiss, 2008 [194]                            |
| Yin, 2014 [282]                                     | Exposure in non-specified settings                                                                                             | Included in Yin, 2014 [283]                              |
| Zhou, 2000 [284]                                    | Duration, exposure from partner, exposure at workplace, exposure during childhood                                              | Included in Wang, 1996 [278]                             |
| Wells, 1991 [305] (Reporting Sandler, 1985 a [145]) | Exposure from partner                                                                                                          | Included in Wells, 1998 [49]                             |

**Supplementary Table 7.** Quality evaluation of the 71 case-control studies included in the present meta-analysis using the New-Castle Ottawa (NOS) scale<sup>a</sup>.

| Author, Year                 | SELECTION                    |                             |                       |                        | COMPARABILITY                                    | EXPOSURE                  |                                           |                   | TOTAL NOS SCORE |
|------------------------------|------------------------------|-----------------------------|-----------------------|------------------------|--------------------------------------------------|---------------------------|-------------------------------------------|-------------------|-----------------|
|                              | Adequate definition of cases | Representativeness of cases | Selection of Controls | Definition of controls | Comparability of cases and controls <sup>b</sup> | Ascertainment of exposure | Same methods of ascertainment of exposure | Non-response rate |                 |
| Akiba, 1986 [235]            | ☆                            | ☆                           | ☆                     | -                      | ☆                                                | ☆                         | ☆                                         | ☆                 | 7               |
| Al-Zoughool, 2013 [306]      | ☆                            | ☆                           | ☆                     | -                      | ☆                                                | -                         | ☆                                         | -                 | 5               |
| Boffetta, 1998 [219]         | ☆                            | -                           | -                     | -                      | ☆                                                | -                         | ☆                                         | -                 | 3               |
| Boffetta, 1999 [237]         | ☆                            | ☆                           | -                     | -                      | ☆                                                | -                         | ☆                                         | ☆                 | 5               |
| Brennan, 2004 [5]            | ☆                            | -                           | -                     | ☆                      | ☆                                                | -                         | ☆                                         | -                 | 4               |
| Brenner, 2010 [238]          | ☆                            | ☆                           | -                     | -                      | ☆                                                | -                         | ☆                                         | ☆                 | 5               |
| Brownson, 1992 [239]         | ☆                            | ☆                           | ☆                     | -                      | ☆                                                | -                         | ☆                                         | ☆                 | 6               |
| Chan-Yeung, 2003 [240]       | ☆                            | ☆                           | -                     | -                      | ☆☆                                               | -                         | ☆                                         | ☆                 | 6               |
| Cheng, 2022 [9]              | -                            | -                           | ☆                     | -                      | ☆☆                                               | -                         | ☆                                         | -                 | 4               |
| Correa, 1983 [242]           | ☆                            | -                           | -                     | -                      | ☆                                                | -                         | ☆                                         | -                 | 3               |
| Dalager, 1986 [243]          | ☆                            | -                           | -                     | -                      | ☆                                                | -                         | ☆                                         | -                 | 3               |
| Du, 1996 [244]               | ☆                            | ☆                           | ☆                     | -                      | ☆                                                | -                         | ☆                                         | -                 | 5               |
| Fontham, 1994 [192]          | ☆                            | ☆                           | ☆                     | ☆                      | ☆☆                                               | -                         | ☆                                         | -                 | 7               |
| Galeone, 2008 [245]          | ☆                            | -                           | -                     | -                      | ☆☆                                               | -                         | ☆                                         | ☆                 | 5               |
| Gallegos-Arreola, 2008 [246] | ☆                            | ☆                           | ☆                     | -                      | -                                                | -                         | ☆                                         | ☆                 | 5               |
| Gao, 1987 [247]              | ☆                            | ☆                           | ☆                     | -                      | ☆                                                | -                         | ☆                                         | -                 | 5               |
| Gorlova, 2006 [248]          | ☆                            | ☆                           | -                     | ☆                      | ☆                                                | -                         | ☆                                         | ☆                 | 6               |
| Han, 2017 [249]              | ☆                            | ☆                           | ☆                     | ☆                      | ☆                                                | -                         | ☆                                         | -                 | 6               |
| Janerich, 1990 [250]         | ☆                            | ☆                           | ☆                     | -                      | ☆                                                | -                         | ☆                                         | -                 | 5               |
| Jockel, 1998 [251]           | ☆                            | -                           | ☆                     | -                      | ☆                                                | -                         | ☆                                         | ☆                 | 5               |
| Johnson, 2001 [252]          | ☆                            | -                           | ☆                     | -                      | ☆                                                | ☆                         | ☆                                         | ☆                 | 6               |
| Kabat, 1995 [207]            | ☆                            | -                           | -                     | -                      | ☆                                                | -                         | ☆                                         | ☆                 | 4               |
| Kalandidi, 1990 [225]        | ☆                            | ☆                           | -                     | -                      | ☆                                                | -                         | ☆                                         | -                 | 4               |



|                       |   |   |   |   |    |   |   |   |   |
|-----------------------|---|---|---|---|----|---|---|---|---|
| Kim, 2014 [23]        | - | - | - | - | ☆  | - | ☆ | - | 2 |
| Kim, 2015 [24]        | - | - | - | - | ☆  | - | ☆ | ☆ | 3 |
| Koo, 1987 [253]       | ☆ | - | ☆ | - | ☆  | - | ☆ | ☆ | 5 |
| Kreuzer, 2000 [211]   | ☆ | - | ☆ | - | ☆  | - | ☆ | - | 4 |
| Kreuzer, 2001 [254]   | ☆ | ☆ | ☆ | - | ☆☆ | - | ☆ | - | 6 |
| Lam, 1987 [255]       | ☆ | ☆ | - | - | ☆  | ☆ | ☆ | ☆ | 6 |
| Lee, 1986 [256]       | ☆ | - | - | - | ☆  | - | ☆ | - | 3 |
| Lee, 2000 [209]       | ☆ | ☆ | - | - | ☆☆ | - | ☆ | ☆ | 6 |
| Lei, 1996 [257]       | ☆ | ☆ | ☆ | ☆ | ☆  | - | ☆ | ☆ | 7 |
| Li, 2016 [258]        | ☆ | ☆ | ☆ | ☆ | ☆☆ | - | ☆ | - | 7 |
| Liang, 2019 [259]     | ☆ | - | ☆ | ☆ | ☆☆ | - | ☆ | ☆ | 7 |
| Lin, 2012 [260]       | ☆ | ☆ | ☆ | - | ☆☆ | - | ☆ | - | 6 |
| Liu, 1991 [262]       | ☆ | - | ☆ | - | ☆☆ | - | ☆ | ☆ | 6 |
| Liu, 1993 [261]       | ☆ | ☆ | - | - | ☆  | - | ☆ | ☆ | 5 |
| Liu, 2020 [263]       | ☆ | ☆ | ☆ | - | ☆☆ | - | ☆ | - | 6 |
| Lo, 2011 [217]        | ☆ | - | - | - | ☆  | - | ☆ | ☆ | 4 |
| Lo, 2013 [216]        | ☆ | ☆ | - | ☆ | ☆  | - | ☆ | ☆ | 6 |
| Malats, 2000 [264]    | ☆ | - | - | - | ☆  | - | ☆ | - | 3 |
| Masjedi, 2013 [205]   | ☆ | - | - | - | ☆  | - | ☆ | ☆ | 4 |
| McGhee, 2005 [265]    | ☆ | ☆ | ☆ | - | -  | ☆ | ☆ | - | 5 |
| Mu, 2013 [266]        | ☆ | ☆ | ☆ | ☆ | ☆  | - | ☆ | ☆ | 7 |
| Nyberg, 1998 [267]    | ☆ | ☆ | ☆ | - | ☆☆ | - | ☆ | ☆ | 7 |
| Qu, 2019 [189]        | ☆ | ☆ | - | - | ☆☆ | - | ☆ | - | 5 |
| Rachtan, 2002 [268]   | ☆ | - | ☆ | - | ☆  | - | ☆ | ☆ | 5 |
| Rapiti, 1999 [269]    | ☆ | ☆ | - | - | ☆  | - | ☆ | - | 4 |
| Ren, 2013 [190]       | ☆ | - | - | - | -  | - | ☆ | - | 2 |
| Seki, 2013 [270]      | ☆ | ☆ | - | ☆ | ☆☆ | - | ☆ | ☆ | 7 |
| Shen, 1998 [271]      | ☆ | ☆ | ☆ | - | ☆  | - | ☆ | - | 5 |
| Sobue, 1990 [272]     | ☆ | ☆ | - | - | ☆  | - | ☆ | ☆ | 5 |
| Spitz, 2011 [198]     | ☆ | ☆ | - | ☆ | ☆  | - | ☆ | ☆ | 6 |
| Stockwell, 1992 [273] | ☆ | ☆ | ☆ | - | ☆  | - | ☆ | ☆ | 6 |

|                          |   |   |   |   |    |   |   |   |   |
|--------------------------|---|---|---|---|----|---|---|---|---|
| Svensson, 1989 [274]     | ☆ | ☆ | - | - | ☆  | - | ☆ | - | 4 |
| Torres-Durán, 2014 [275] | ☆ | - | - | - | ☆  | - | ☆ | ☆ | 4 |
| Tse, 2009 [276]          | ☆ | ☆ | ☆ | - | ☆  | - | ☆ | - | 5 |
| Tubío-Pérez, 2022 [223]  | ☆ | - | - | - | ☆☆ | - | ☆ | ☆ | 5 |
| Wang, 1996 [279]         | ☆ | - | - | - | ☆  | - | ☆ | - | 3 |
| Wang, 1996 [278]         | ☆ | ☆ | ☆ | - | ☆  | - | ☆ | - | 5 |
| Wang, 2000 [277]         | ☆ | ☆ | ☆ | - | ☆  | - | ☆ | ☆ | 6 |
| Wang, 2009 [232]         | ☆ | ☆ | ☆ | ☆ | ☆☆ | - | ☆ | - | 7 |
| Wu, 1985 [280]           | ☆ | ☆ | ☆ | ☆ | ☆  | - | ☆ | ☆ | 7 |
| Wu-Williams, 1990 [228]  | ☆ | ☆ | ☆ | - | ☆  | - | ☆ | - | 5 |
| Yang, 2015 [281]         | ☆ | - | ☆ | - | ☆  | - | ☆ | - | 4 |
| Yin, 2014 [283]          | ☆ | - | - | ☆ | ☆  | - | ☆ | - | 4 |
| Yin, 2014 [282]          | ☆ | ☆ | - | - | ☆  | - | ☆ | - | 4 |
| Zatloukal, 2003 [213]    | ☆ | ☆ | ☆ | - | ☆  | - | ☆ | - | 5 |
| Zhong, 1999 [234]        | ☆ | ☆ | ☆ | - | ☆☆ | - | ☆ | ☆ | 7 |
| Zhou, 2000 [284]         | ☆ | ☆ | ☆ | - | ☆☆ | - | ☆ | - | 6 |
| Zhuang, 2022 [201]       | ☆ | - | ☆ | - | ☆☆ | - | ☆ | ☆ | 6 |

<sup>a</sup> Each item could be scored with a maximum of one star, except for the item “Comparability of cases and controls” which could receive a maximum of two stars; <sup>b</sup> Studies controlling for age or sex in the design or in the analysis received one star. Studies with all the previous variables and at least one of the following variables: exposure to pollutants (e.g., air pollution, radon, asbestos) and family history of lung cancer, received two stars.

**Supplementary Table 8.** Quality evaluation of the 27 cohort studies included in the present meta-analysis using the New-Castle Ottawa (NOS) scale<sup>a</sup>.

| Author, Year             | SELECTION                                |                                     |                           |                                                   | COMPARABILITY                         | EXPOSURE                 |                                                         |                                            | TOTAL NOS SCORE |
|--------------------------|------------------------------------------|-------------------------------------|---------------------------|---------------------------------------------------|---------------------------------------|--------------------------|---------------------------------------------------------|--------------------------------------------|-----------------|
|                          | Representativeness of the exposed cohort | Selection of the non-exposed cohort | Ascertainment of exposure | Outcome of interest not present at start of study | Comparability of cohorts <sup>b</sup> | Ascertainment of outcome | Follow-up long enough for outcome to occur <sup>c</sup> | Adequacy of follow-up cohorts <sup>d</sup> |                 |
| Abdel-Rahman, 2020 [285] | ☆                                        | ☆                                   | ☆                         | ☆                                                 | ☆☆                                    | ☆                        | ☆                                                       | -                                          | 8               |
| Cardenas, 1997 [286]     | ☆                                        | ☆                                   | ☆                         | -                                                 | ☆☆                                    | ☆                        | -                                                       | ☆                                          | 7               |
| Cheng, 2022 [9]          | ☆                                        | ☆                                   | -                         | ☆                                                 | ☆☆                                    | ☆                        | -                                                       | -                                          | 6               |
| Cheng, 2022 [241]        | ☆                                        | ☆                                   | ☆                         | ☆                                                 | ☆☆                                    | ☆                        | ☆                                                       | -                                          | 8               |
| de Waard, 1995 [287]     | ☆                                        | ☆                                   | -                         | -                                                 | -                                     | ☆                        | ☆                                                       | -                                          | 4               |
| Enstrom, 2003 [196]      | ☆                                        | ☆                                   | ☆                         | ☆                                                 | ☆                                     | ☆                        | ☆                                                       | ☆                                          | 8               |
| Erhunmwunsee, 2022 [288] | ☆                                        | ☆                                   | ☆                         | -                                                 | ☆☆                                    | ☆                        | ☆                                                       | -                                          | 7               |
| Hansen, 2021 [289]       | ☆                                        | ☆                                   | ☆                         | ☆                                                 | ☆                                     | ☆                        | ☆                                                       | ☆                                          | 8               |
| He, 2012 [290]           | ☆                                        | ☆                                   | ☆                         | -                                                 | ☆                                     | ☆                        | ☆                                                       | ☆                                          | 7               |
| Hill, 2007 [291]         | ☆                                        | ☆                                   | ☆                         | -                                                 | ☆                                     | ☆                        | -                                                       | ☆                                          | 6               |
| Hirayama, 1984 [203]     | ☆                                        | ☆                                   | ☆                         | -                                                 | -                                     | ☆                        | ☆                                                       | -                                          | 5               |
| Hole, 1989 [292]         | ☆                                        | ☆                                   | ☆                         | -                                                 | ☆                                     | ☆                        | ☆                                                       | -                                          | 6               |
| Jee, 1999 [293]          | -                                        | ☆                                   | ☆                         | -                                                 | ☆                                     | ☆                        | -                                                       | ☆                                          | 5               |
| Kurahashi, 2008 [307]    | ☆                                        | ☆                                   | ☆                         | ☆                                                 | ☆☆                                    | ☆                        | ☆                                                       | ☆                                          | 9               |
| Li, 2020 [295]           | -                                        | ☆                                   | ☆                         | ☆                                                 | ☆☆                                    | ☆                        | -                                                       | -                                          | 6               |
| Miller, 1994 [296]       | ☆                                        | ☆                                   | ☆                         | -                                                 | -                                     | ☆                        | ☆                                                       | -                                          | 5               |
| Nishino, 2001 [297]      | ☆                                        | ☆                                   | ☆                         | ☆                                                 | ☆                                     | ☆                        | -                                                       | -                                          | 6               |
| Ozasa, 2007 [298]        | -                                        | -                                   | ☆                         | -                                                 | -                                     | -                        | -                                                       | -                                          | 1               |
| Pershagen, 1987 [299]    | ☆                                        | ☆                                   | ☆                         | -                                                 | ☆                                     | ☆                        | ☆                                                       | -                                          | 6               |
| Pirie, 2016 [300]        | ☆                                        | ☆                                   | ☆                         | ☆                                                 | ☆                                     | ☆                        | ☆                                                       | -                                          | 7               |
| Speizer, 1999 [301]      | -                                        | ☆                                   | ☆                         | ☆                                                 | ☆                                     | ☆                        | ☆                                                       | -                                          | 6               |

|                    |   |   |   |   |    |   |   |   |   |
|--------------------|---|---|---|---|----|---|---|---|---|
| Veglia, 2007 [302] | ☆ | ☆ | ☆ | - | ☆  | ☆ | - | - | 5 |
| Vineis, 2007 [187] | ☆ | ☆ | ☆ | - | ☆  | ☆ | - | - | 5 |
| Wang, 2015 [303]   | ☆ | ☆ | ☆ | - | ☆☆ | ☆ | ☆ | - | 7 |
| Weiss, 2008 [194]  | ☆ | ☆ | ☆ | ☆ | -  | ☆ | - | - | 5 |
| Wen, 2006 [304]    | ☆ | ☆ | ☆ | - | ☆  | ☆ | - | ☆ | 6 |
| Zhang, 2022 [305]  | ☆ | ☆ | ☆ | - | ☆  | - | - | - | 4 |

<sup>a</sup> Each item could be scored with a maximum of one star, except for the item “Comparability of cohorts” which could receive a maximum of two stars; <sup>b</sup> Studies controlling for age or sex in the design or in the analysis received one star. Studies with all the previous variables and at least one of the following variables: exposure to pollutants (e.g., air pollution, radon, asbestos) and family history of lung cancer, received two stars; <sup>c</sup> Studies with follow-up time  $\geq 10$  years received one star; <sup>d</sup> Studies with follow-up rate  $\geq 80\%$  or with a description of those lost at follow-up received one star.

**Supplementary Figure 1.** Forest plot of study-specific and pooled relative risk (RR) of lung cancer for secondhand smoke (SHS) exposure at home, by study design.

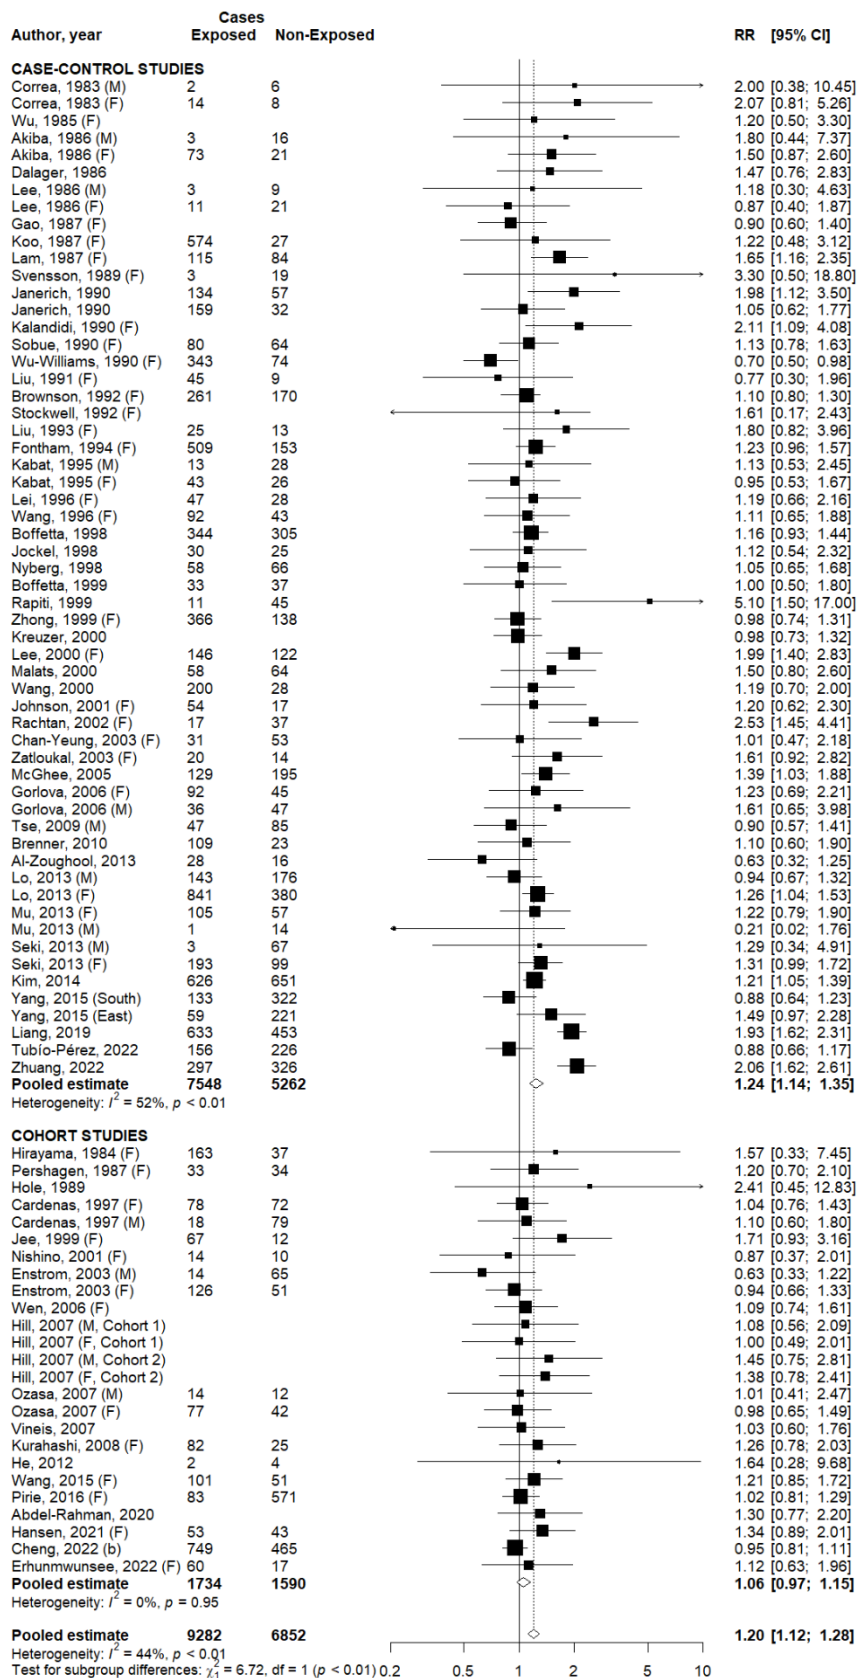

F: females; M: males.

**Supplementary Figure 2.** Forest plot of study-specific and pooled relative risk (RR) of lung cancer for secondhand smoke (SHS) exposure at workplace, by study design.

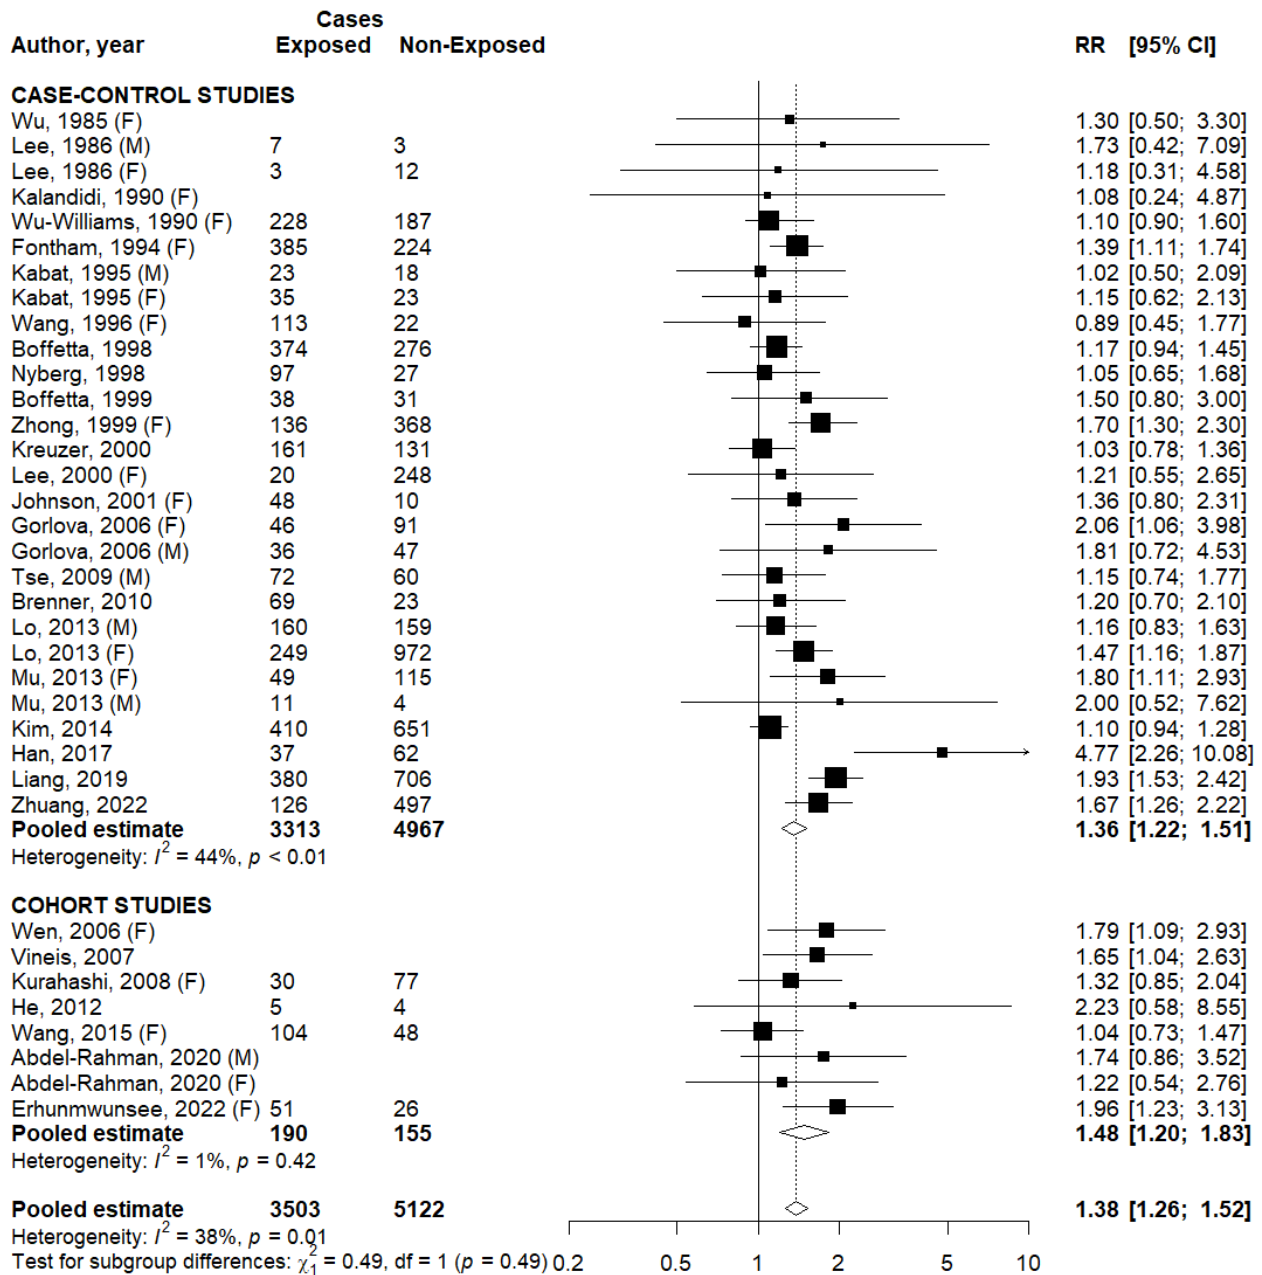

F: females; M: males.

**Supplementary Figure 3.** Forest plot of study-specific and pooled relative risk (RR) of lung cancer for secondhand smoke (SHS) exposure at home or workplace, by study design.

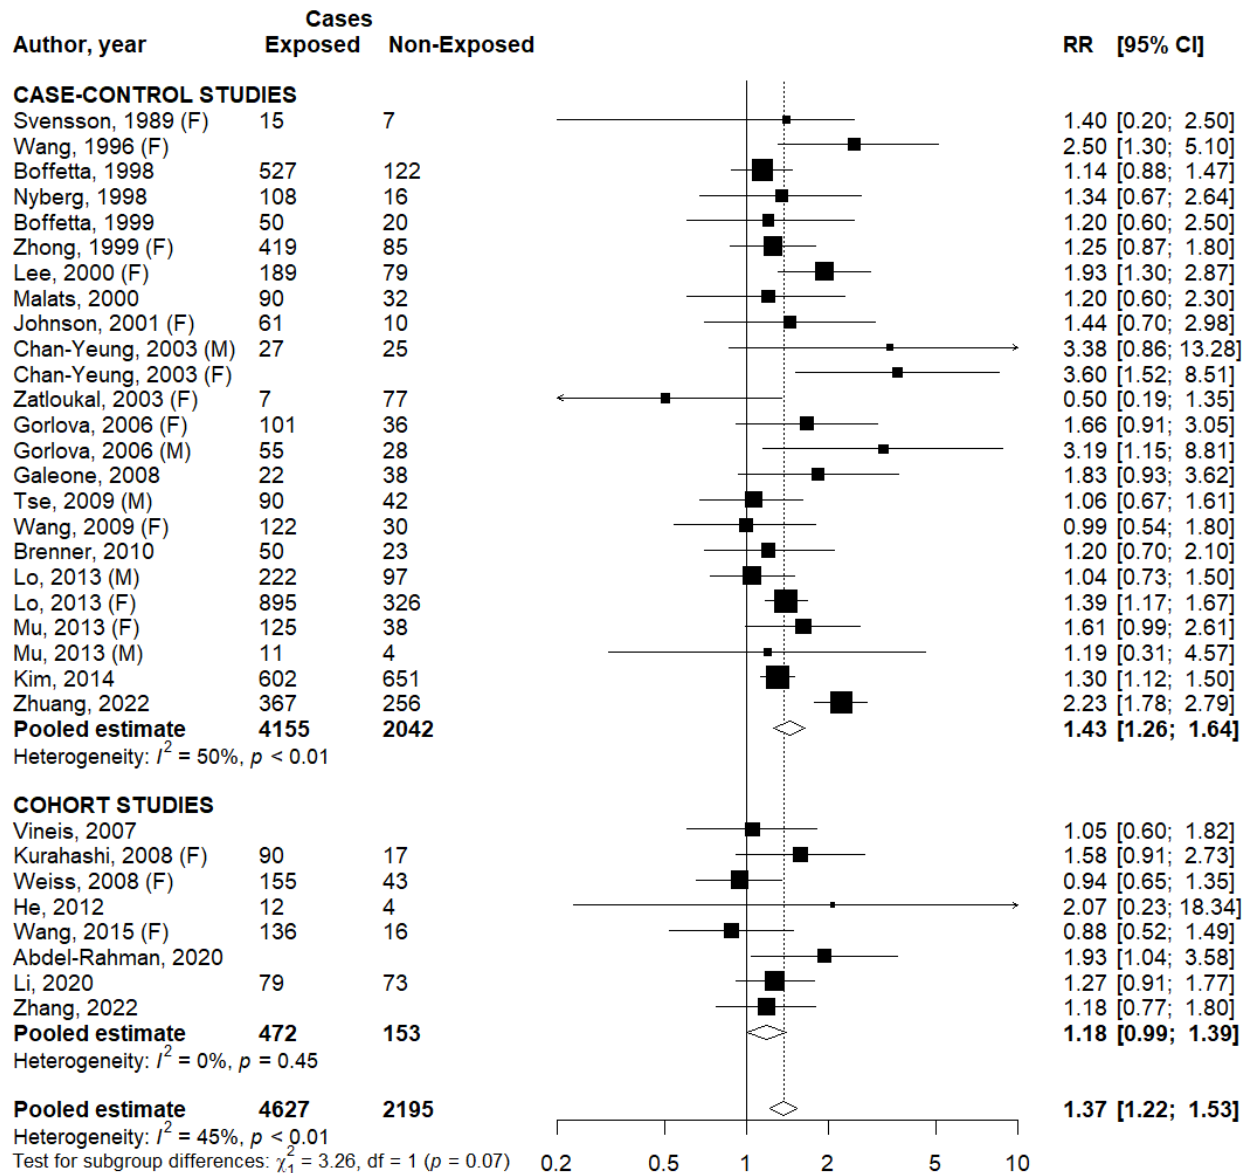

F: females; M: males.

**Supplementary Figure 4.** Forest plot of study-specific and pooled relative risk (RR) of lung cancer for secondhand smoke (SHS) exposure in non-specified settings, by study design.

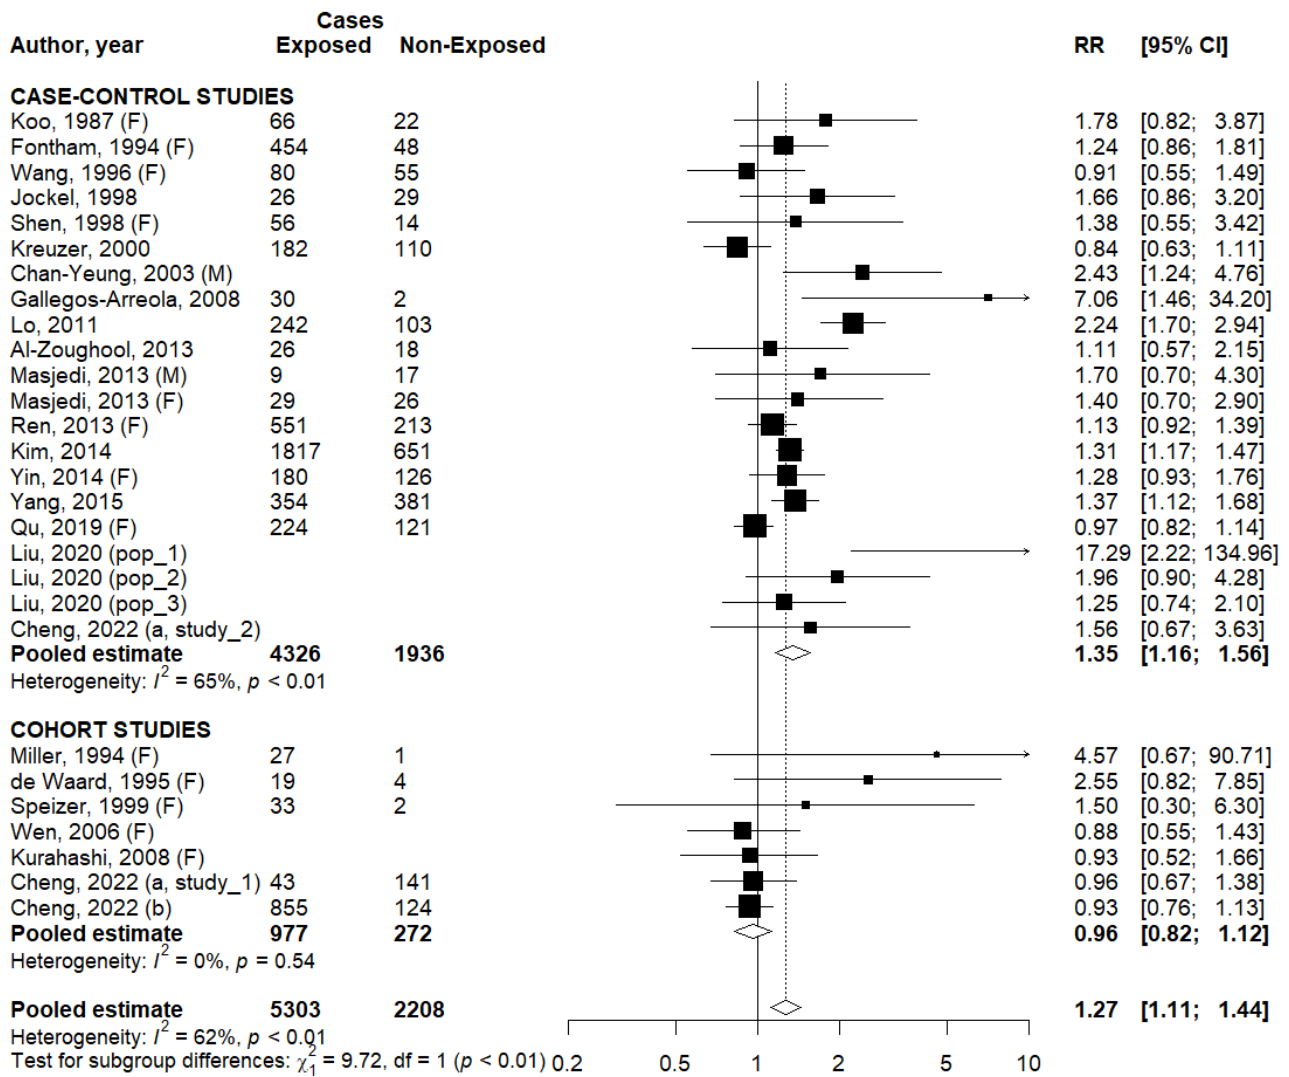

F: females; M: males.



**Supplementary Figure 5.** Forest plot of study-specific and pooled relative risk (RR) of lung cancer for secondhand smoke (SHS) exposure from partner, by study design.

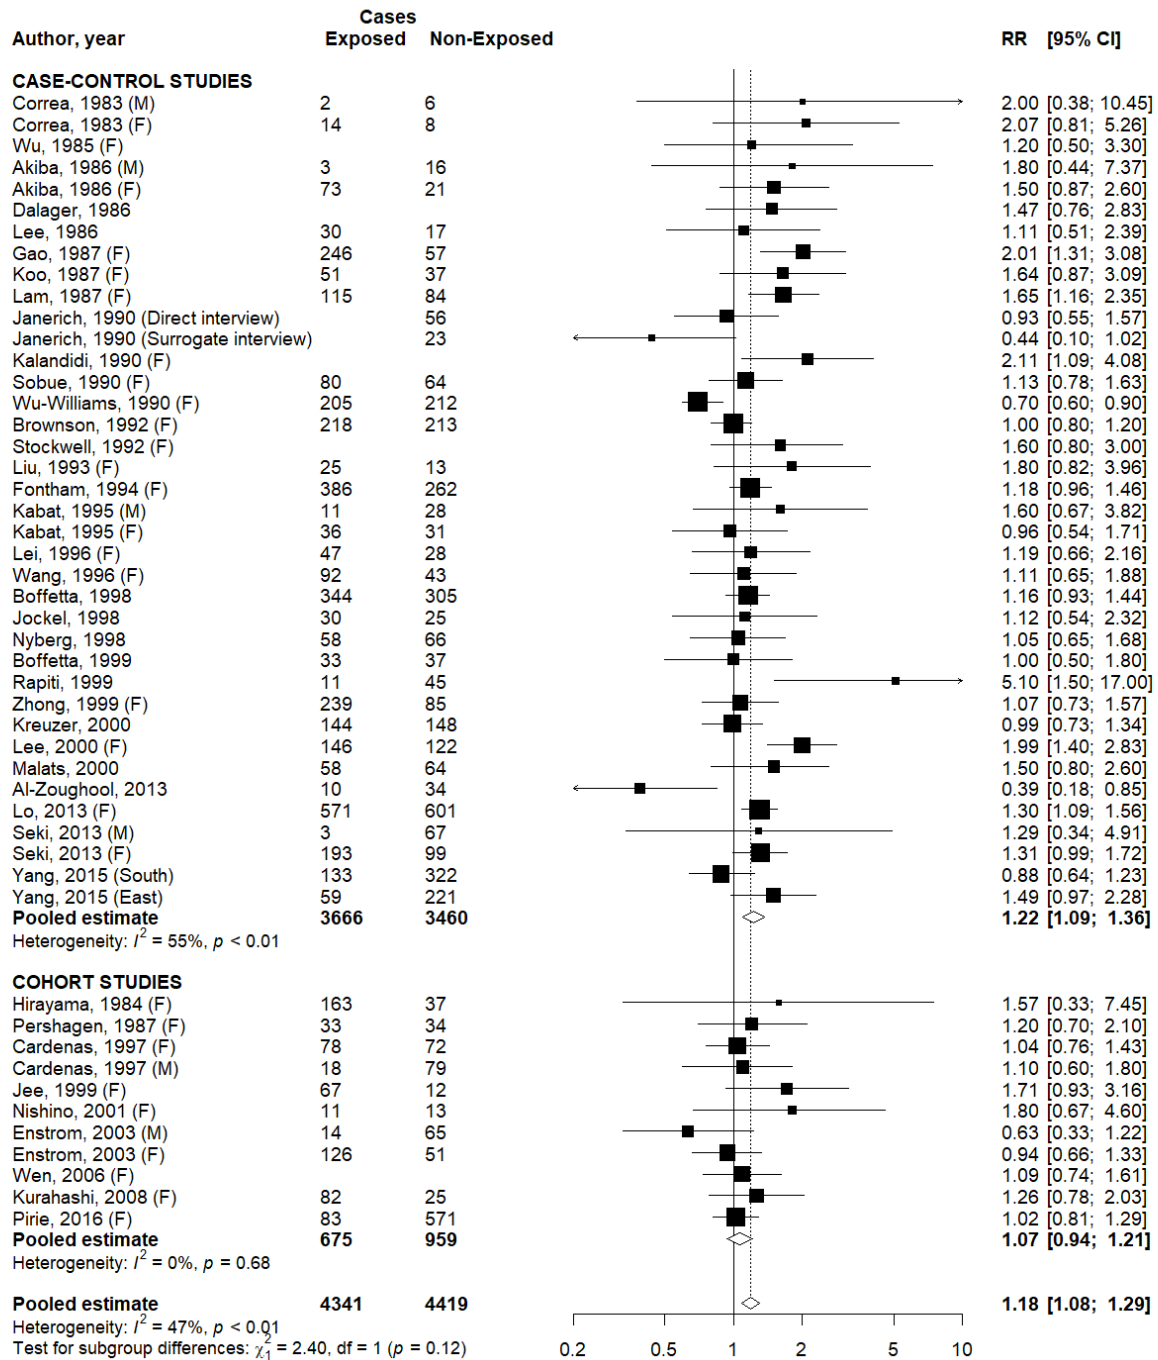

F: females; M: males.

**Supplementary Figure 6.** Forest plot of study-specific and pooled relative risk (RR) of lung cancer for secondhand smoke (SHS) exposure during childhood, by study design.

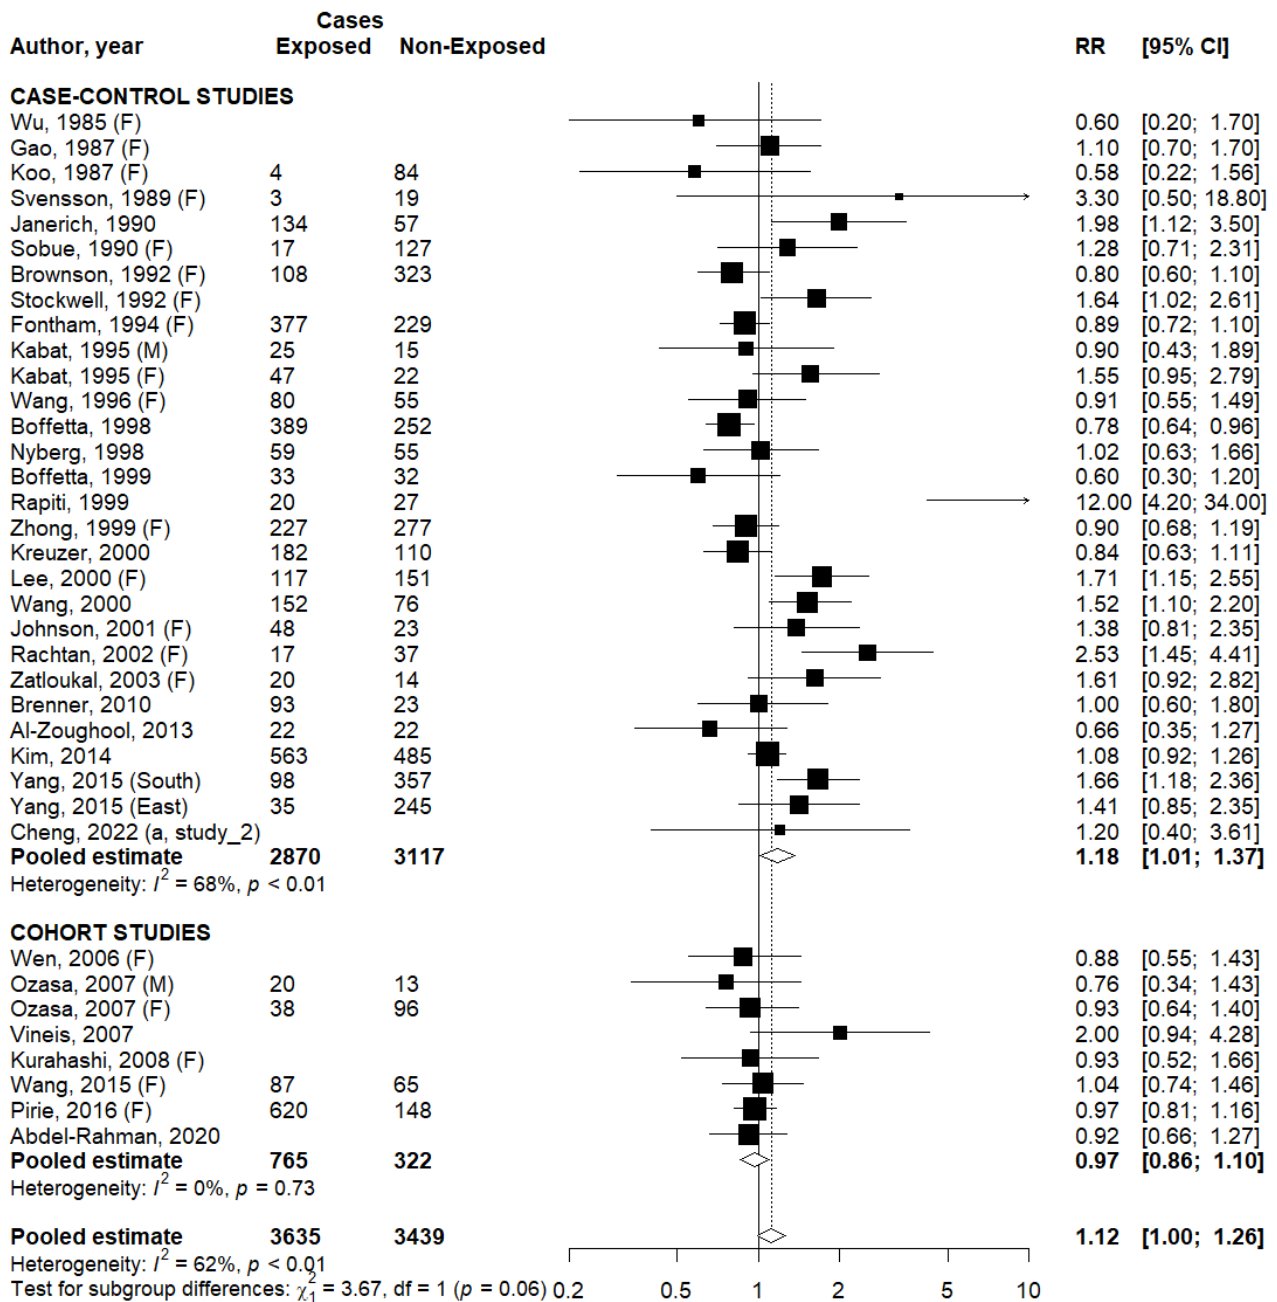

F: females; M: males.

**Supplementary Figure 7.** Forest plot of study-specific and pooled relative risk (RR) of lung adenocarcinoma for secondhand smoke (SHS) exposure.

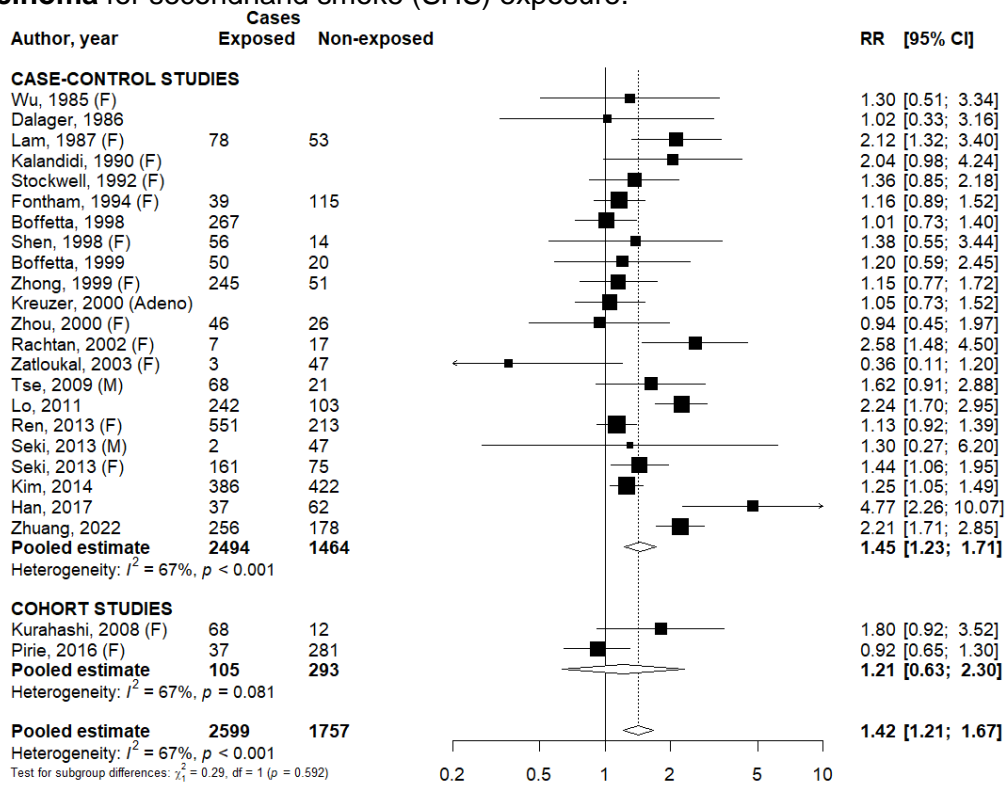

F: females; M: males.

**Supplementary Figure 8.** Funnel plots of studies on the association between overall exposure (panel A), at home exposure (panel B), at work exposure (panel C), at home or at work exposure (panel D), exposure in non-specified settings (panel E), exposure from partner (panel F), and childhood exposure (panel G) to secondhand smoke (SHS) and lung cancer risk.

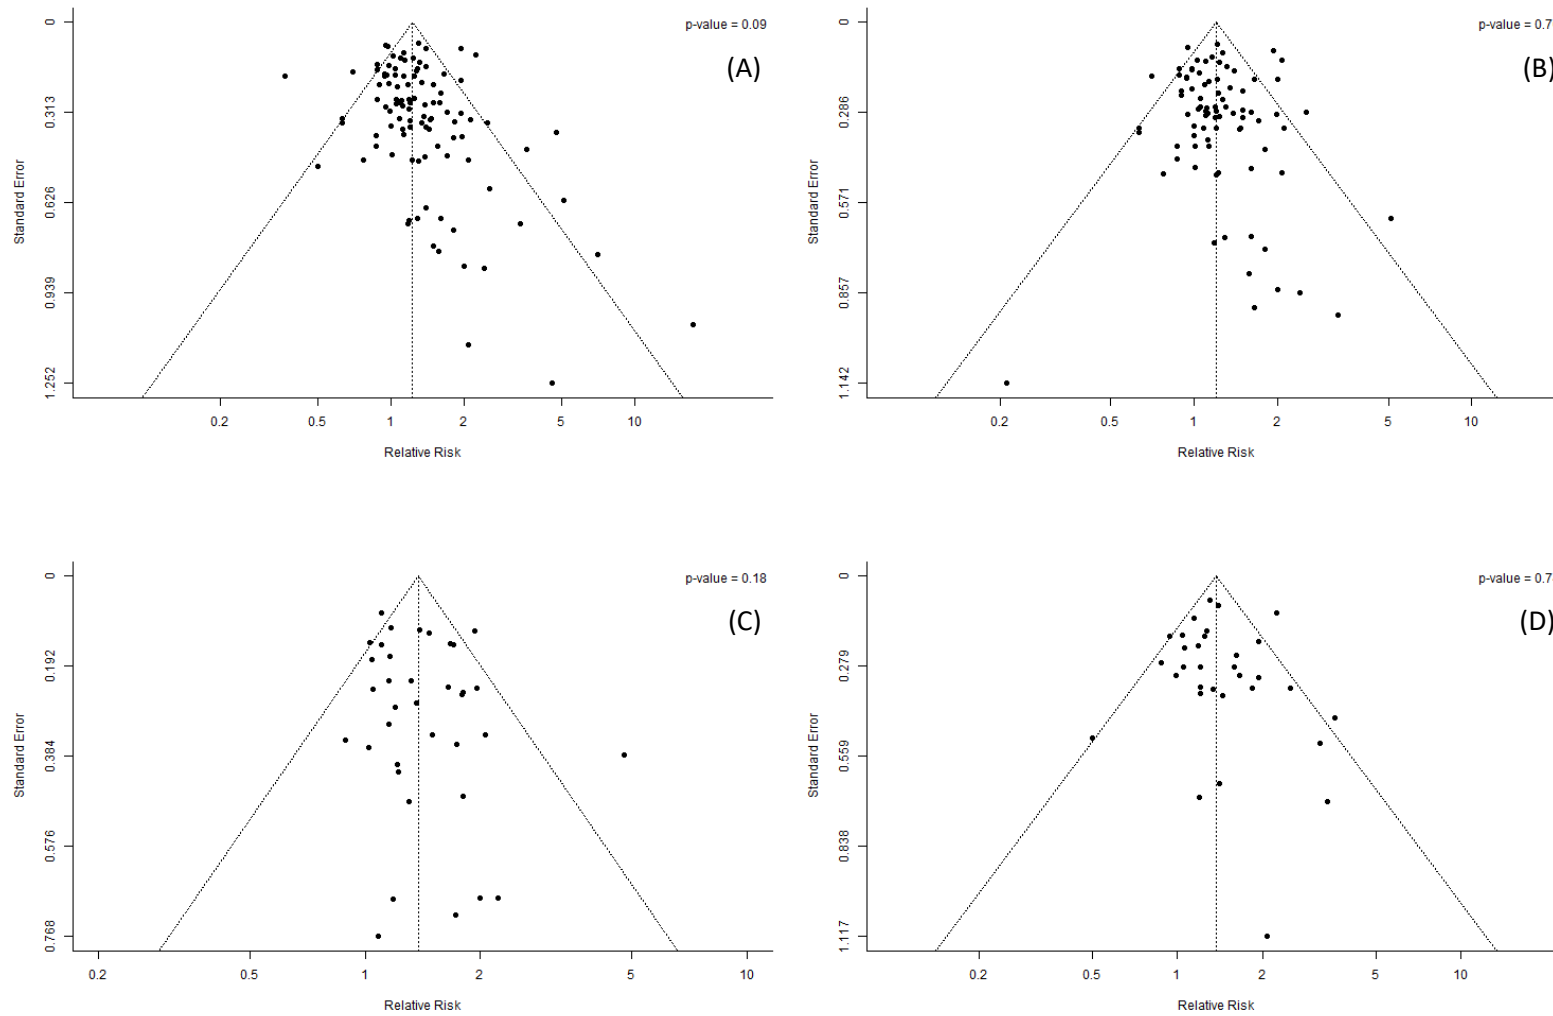

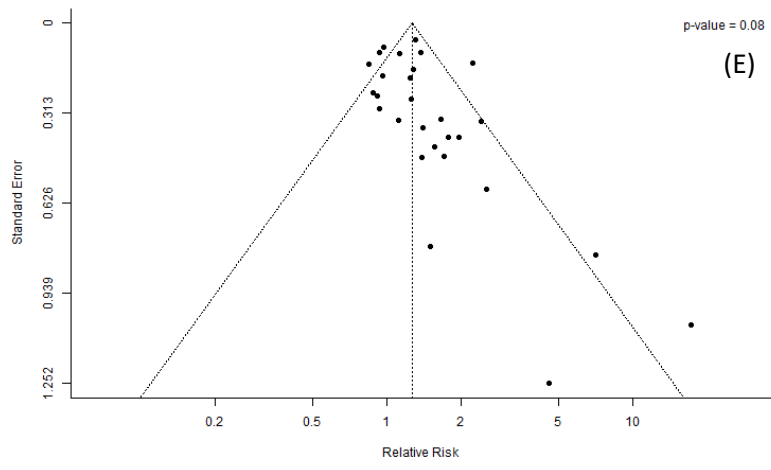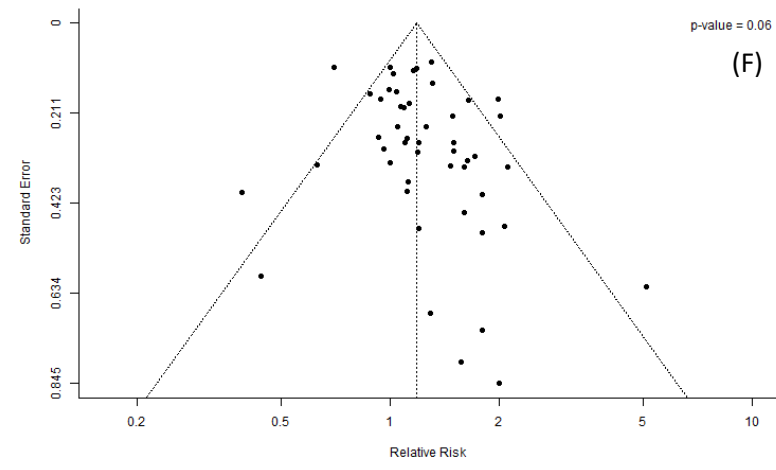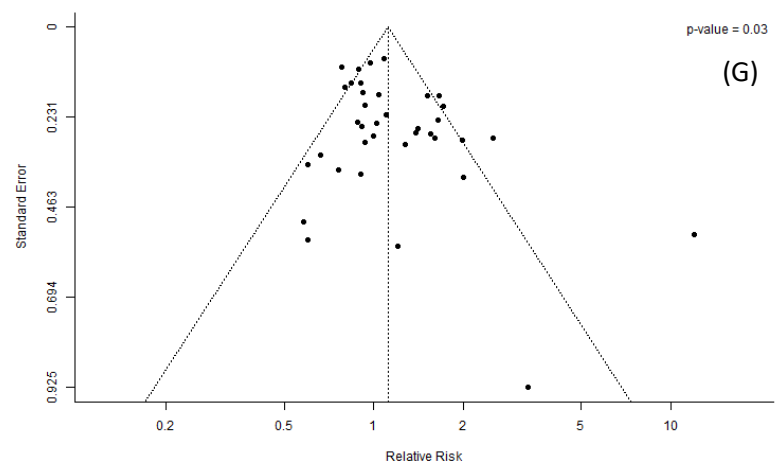

**Supplementary Table 9.** Pooled relative risk (RR) and corresponding 95% confidence interval (CI) of lung cancer for never smokers exposed to secondhand smoke (SHS) versus non-exposed to SHS in studies with high quality (Newcastle Ottawa Scale  $\geq 7$ ).

| <b>Strata</b>                   | <b>N. studies</b> | <b>Pooled RR (95% CI)</b> | <b>p-value<sup>a</sup></b> |
|---------------------------------|-------------------|---------------------------|----------------------------|
| <b>Total</b>                    | 20                | 1.21 (1.08-1.37)          | <0.01                      |
| <b>Settings of SHS exposure</b> |                   |                           |                            |
| At home <sup>b</sup>            | 19                | 1.17 (1.04-1.31)          | <0.01                      |
| At workplace                    | 11                | 1.51 (1.30-1.76)          | 0.23                       |
| At home or workplace            | 8                 | 1.31 (1.08-1.59)          | <0.01                      |
| Non-specified                   | 3                 | 1.00 (0.82-1.21)          | 0.40                       |
| <b>Specific sources</b>         |                   |                           |                            |
| From partner                    | 11                | 1.11 (1.01-1.23)          | 0.88                       |
| During childhood                | 8                 | 0.94 (0.85-1.11)          | 0.98                       |

<sup>a</sup>p-value for heterogeneity within strata; <sup>b</sup>Including exposure from partner.

**Supplementary Box 1.** Literature search strings for the update of the last available comprehensive review used in PubMed/MEDLINE and Embase.

| <b>Source</b> | <b>Date</b> | <b>Search string</b>                                                                                                                                                                                                                                                                                                           | <b>N</b>                     |
|---------------|-------------|--------------------------------------------------------------------------------------------------------------------------------------------------------------------------------------------------------------------------------------------------------------------------------------------------------------------------------|------------------------------|
| PubMed        | 10/05/2023  | (lung) OR (trachea) OR (bronchus) AND (cancer OR neoplasm OR carcinoma OR adenocarcinoma OR Neoplasms [MeSH Terms]) AND (“secondhand” OR “second-hand” OR “environmental tobacco” OR “passive smok*” OR "tobacco smoke pollution"[Mesh]) AND (English[Language]) AND ("2008"[Date - Publication] : "2023"[Date - Publication]) | 723                          |
| Embase        | 10/05/2023  | (secondhand:ti OR second-hand:ti OR “environmental tobacco”:ti) AND (lung:ab,ti OR trachea:ab,ti OR bronchus:ab,ti) AND (cancer:ab,ti OR neoplasm:ab,ti OR carcinoma:ab,ti OR adenocarcinoma:ab,ti) AND (article:it OR review:it) AND [english]/lim AND [2008-2023]/py                                                         | 108                          |
| <b>TOT</b>    | 10/05/2023  | -                                                                                                                                                                                                                                                                                                                              | <b>728</b><br>Non-duplicates |

**Supplementary Box 2.** Functions of the linear and spline models used to estimate the associations between secondhand smoke (SHS) duration (in years), intensity (in number of daily cigarettes), and pack-years of exposure and the risk of lung cancer.

---

**SHS duration (years)**

$$f(x) = \begin{cases} 0.0000000828x^3 + 0.0225906x & 0 \leq x < 15.0 \\ 0.0000033920x^3 - 0.000590201x^2 + 0.0367554x - 0.113319 & 15.0 \leq x < 43.2 \\ 0.00252373x + 0.548493 & x \geq 43.2 \end{cases}$$

---

**SHS intensity (cigarettes/day)**

$$f(x) = 0.009516851x$$

---

**SHS Pack-Years**

$$f(x) = 0.01016343x$$

---



## References

1. Biggerstaff BJ, Tweedie RL, Mengersen KL. Passive smoking in the workplace: classical and Bayesian meta-analyses. *Int Arch Occup Environ Health* 1994; 66: 269-277.
2. Blot WJ, Fraumeni JF, Jr. Passive smoking and lung cancer. *J Natl Cancer Inst* 1986; 77: 993-1000.
3. Boffetta P, Trédaniel J, Greco A. Risk of childhood cancer and adult lung cancer after childhood exposure to passive smoke: A meta-analysis. *Environ Health Perspect* 2000; 108: 73-82.
4. Boffetta P. Involuntary smoking and lung cancer. *Scand J Work Environ Health* 2002; 28 Suppl 2: 30-40.
5. Brennan P, Buffler PA, Reynolds P et al. Secondhand smoke exposure in adulthood and risk of lung cancer among never smokers: a pooled analysis of two large studies. *Int J Cancer* 2004; 109: 125-131.
6. Brown KG. Lung cancer and environmental tobacco smoke: occupational risk to nonsmokers. *Environ Health Perspect* 1999; 107 Suppl 6: 885-890.
7. California Environmental Protection Agency. Proposed Identification of Environmental Tobacco Smoke as a Toxic Air Contaminant. California Environmental Protection Agency 2005.
8. Chappell WR, Gratt LB. A graphical method for pooling epidemiological studies. *Am J Public Health* 1996; 86: 748-750.
9. Cheng ES, Weber MF, Steinberg J et al. Evaluating risk factors for lung cancer among never-smoking individuals using two Australian studies. *Journal of Cancer Research and Clinical Oncology* 2022; 148: 2827-2840.
10. Dockery DW, Trichopoulos D. Risk of lung cancer from environmental exposures to tobacco smoke. *Cancer Causes and Control* 1997; 8: 333-345.
11. Du Y, Cui X, Sidorenkov G et al. Lung cancer occurrence attributable to passive smoking among never smokers in China: a systematic review and meta-analysis. *Transl Lung Cancer Res* 2020; 9: 204-217.
12. Faghani A, Guo L, Wright ME et al. Construction and case study of a novel lung cancer risk index. *BMC Cancer* 2022; 22: 1275.
13. Fry JS, Lee PN. Revisiting the association between environmental tobacco smoke exposure and lung cancer risk - I. The dose-response relationship with amount and duration of smoking by the husband. *Indoor and Built Environment* 2000; 9: 303-316.
14. Fry JS, Lee PN. Revisiting the association between environmental tobacco smoke exposure and lung cancer risk: II. Adjustment for the potential confounding effects of fruit, vegetables, dietary fat and education. *Indoor and Built Environment* 2001; 10: 20-39.
15. Gross AJ, Van Leeuwen FE. Presentation and Dissent. The risk of lung cancer in nonsmokers in the united states and its reported association with environmental tobacco smoke. *Journal of Clinical Epidemiology* 1995; 48: 587-606.

16. Hackshaw AK, Law MR, Wald NJ. The accumulated evidence on lung cancer and environmental tobacco smoke. *Bmj* 1997; 315: 980-988.
17. Hauri DD, Lieb CM, Rajkumar S et al. Direct health costs of environmental tobacco smoke exposure and indirect health benefits due to smoking ban introduction. *Eur J Public Health* 2011; 21: 316-322.
18. Hori M, Tanaka H, Wakai K et al. Secondhand smoke exposure and risk of lung cancer in Japan: a systematic review and meta-analysis of epidemiologic studies. *Jpn J Clin Oncol* 2016; 46: 942-951.
19. Huang J, Yue N, Shi N et al. Influencing factors of lung cancer in nonsmoking women: systematic review and meta-analysis. *J Public Health (Oxf)* 2022; 44: 259-268.
20. IARC. Tobacco smoke and involuntary smoking. Vol. 83. IARC Monogr Eval Carcinog Risks Hum 2004; 1-1438.
21. IARC. Personal habits and indoor combustions. Volume 100 E. IARC Monogr Eval Carcinog Risks Hum 2012; 1-538.
22. Jayes L, Haslam PL, Gratziou CG et al. SmokeHaz: Systematic Reviews and Meta-analyses of the Effects of Smoking on Respiratory Health. *Chest* 2016; 150: 164-179.
23. Kim CH, Lee YC, Hung RJ et al. Exposure to secondhand tobacco smoke and lung cancer by histological type: a pooled analysis of the International Lung Cancer Consortium (ILCCO). *Int J Cancer* 2014; 135: 1918-1930.
24. Kim CH, Lee YC, Hung RJ et al. Secondhand Tobacco Smoke Exposure and Lung Adenocarcinoma In Situ/Minimally Invasive Adenocarcinoma (AIS/MIA). *Cancer Epidemiol Biomarkers Prev* 2015; 24: 1902-1906.
25. Kim AS, Ko HJ, Kwon JH, Lee JM. Exposure to Secondhand Smoke and Risk of Cancer in Never Smokers: A Meta-Analysis of Epidemiologic Studies. *Int J Environ Res Public Health* 2018; 15.
26. Law MR, Hackshaw AK. Environmental tobacco smoke. *Br Med Bull* 1996; 52: 22-34.
27. Lee PN, Forey B, Fry JS. Revisiting the association between environmental tobacco smoke exposure and lung cancer risk. *Indoor and Built Environment* 2001; 10: 384-398.
28. Lee PN, Forey B, Fry JS. Revisiting the association between environmental tobacco smoke exposure and lung cancer risk: IV. Investigating heterogeneity between studies. *Indoor and Built Environment* 2002; 11: 4-17.
29. Lee PN, Fry JS, Forey B. Revisiting the association between environmental tobacco smoke exposure and lung cancer risk. *Indoor and Built Environment* 2002; 11: 59-82.
30. Letzel H, Blumner E, Uberla K. META-ANALYSES ON PASSIVE SMOKING AND LUNG-CANCER EFFECTS OF STUDY SELECTION AND MISCLASSIFICATION OF EXPOSURE. *Environmental Technology Letters* 1988; 9: 491-500.
31. LeVois ME, Layard MW. Inconsistency between workplace and spousal studies of environmental tobacco smoke and lung cancer. *Regul Toxicol Pharmacol* 1994; 19: 309-316.
32. Li M, Liu X, Zhang L. The relationship of indoor coal use and environmental tobacco smoke exposure with lung cancer in China: A meta-analysis. *J Cancer Res Ther* 2018; 14: S7-s13.

33. Ni X, Xu N, Wang Q. Meta-Analysis and Systematic Review in Environmental Tobacco Smoke Risk of Female Lung Cancer by Research Type. *Int J Environ Res Public Health* 2018; 15.
34. Okazaki I, Ishikawa S, Ando W, Sohara Y. Lung Adenocarcinoma in Never Smokers: Problems of Primary Prevention from Aspects of Susceptible Genes and Carcinogens. *Anticancer Res* 2016; 36: 6207-6224.
35. Park S, Jee SH, Shin HR et al. Attributable fraction of tobacco smoking on cancer using population-based nationwide cancer incidence and mortality data in Korea. *BMC Cancer* 2014; 14: 406.
36. Saracci R, Riboli E. Passive smoking and lung cancer: current evidence and ongoing studies at the International Agency for Research on Cancer. *Mutat Res* 1989; 222: 117-127.
37. U.S. Department of Health and Human Services. *Women and Smoking: A Report of the Surgeon General*. 2001.
38. U.S. Department of Health and Human Services. *The Health Consequences of Involuntary Exposure to Tobacco Smoke*. 2006.
39. Sheng L, Tu JW, Tian JH et al. A meta-analysis of the relationship between environmental tobacco smoke and lung cancer risk of nonsmoker in China. *Medicine (Baltimore)* 2018; 97: e11389.
40. Spitzer WO, Lawrence V, Dales R et al. Links between passive smoking and disease: a best-evidence synthesis. A report of the Working Group on Passive Smoking. *Clin Invest Med* 1990; 13: 17-42; discussion 43-16.
41. Stayner L, Bena J, Sasco AJ et al. Lung cancer risk and workplace exposure to environmental tobacco smoke. *Am J Public Health* 2007; 97: 545-551.
42. Taylor R, Cumming R, Woodward A, Black M. Passive smoking and lung cancer: a cumulative meta-analysis. *Aust N Z J Public Health* 2001; 25: 203-211.
43. Taylor R, Najafi F, Dobson A. Meta-analysis of studies of passive smoking and lung cancer: effects of study type and continent. *Int J Epidemiol* 2007; 36: 1048-1059.
44. Tweedie RL, Mengersen KL. Lung cancer and passive smoking: reconciling the biochemical and epidemiological approaches. *Br J Cancer* 1992; 66: 700-705.
45. Tweedie RL, Scott DJ, Biggerstaff BJ, Mengersen KL. Bayesian meta-analysis, with application to studies of ETS and lung cancer. *Lung Cancer* 1996; 14 Suppl 1: S171-194.
46. Wald NJ, Nanchahal K, Thompson SG, Cuckle HS. Does breathing other people's tobacco smoke cause lung cancer? *Br Med J (Clin Res Ed)* 1986; 293: 1217-1222.
47. Wang TJ, Zhou BS. Meta-analysis of the potential relationship between exposure to environmental tobacco smoke and lung cancer in nonsmoking Chinese women. *Lung Cancer* 1997; 16: 145-150.
48. Wang YT, Hu KR, Zhao J et al. The Association between Exposure to Second-Hand Smoke and Disease in the Chinese Population: A Systematic Review and Meta-Analysis. *Biomed Environ Sci* 2023; 36: 24-37.

49. Wells AJ. Lung cancer from passive smoking at work. *Am J Public Health* 1998; 88: 1025-1029.
50. Zhang Z, Zhang X, Gao Y et al. Risk factors for the development of lung cancer among never smokers: A systematic review. *Cancer Epidemiol* 2022; 81: 102274.
51. Zhao Y, Wang S, Aunan K et al. Air pollution and lung cancer risks in China--a meta-analysis. *Sci Total Environ* 2006; 366: 500-513.
52. Zhong L, Goldberg MS, Parent ME, Hanley JA. Exposure to environmental tobacco smoke and the risk of lung cancer: a meta-analysis. *Lung Cancer* 2000; 27: 3-18.
53. Alavanja M, Brownson R, Benichou J et al. Attributable risk of lung cancer in nonsmoking women. *Int Symp on Lifestyle Factors and Human Lung Cancer, Guangzhou, 1994*; 1-13.
54. Asomaning K, Miller DP, Liu G et al. Second hand smoke, age of exposure and lung cancer risk. *Lung Cancer* 2008; 61: 13-20.
55. Behera D, Balamugesh T. Indoor air pollution as a risk factor for lung cancer in women. *J Assoc Physicians India* 2005; 53: 190-192.
56. Bennett WP, Alavanja MC, Blomeke B et al. Environmental tobacco smoke, genetic susceptibility, and risk of lung cancer in never-smoking women. *J Natl Cancer Inst* 1999; 91: 2009-2014.
57. Bock CH, Wenzlaff AS, Cote ML et al. NQO1 T allele associated with decreased risk of later age at diagnosis lung cancer among never smokers: results from a population-based study. *Carcinogenesis* 2005; 26: 381-386.
58. Boffetta P, Agudo A, Ahrens W et al. European Multicentre Case-Control Study of Lung Cancer in Non-Smokers. Detailed Results on Exposure to Environmental Tobacco Smoke. Lyon, France, IARC 1998.
59. Boffetta P, Nyberg F, Agudo A et al. Risk of lung cancer from exposure to environmental tobacco smoke from cigars, cigarillos and pipes. *Int J Cancer* 1999; 83: 805-806.
60. Bonner MR, Bennett WP, Xiong W et al. Radon, secondhand smoke, glutathione-S-transferase M1 and lung cancer among women. *Int J Cancer* 2006; 119: 1462-1467.
61. Brennan P, Butler J, Agudo A et al. Joint effect of diet and environmental tobacco smoke on risk of lung cancer among nonsmokers. *J Natl Cancer Inst* 2000; 92: 426-427.
62. Brownson RC, Reif JS, Keefe TJ et al. Risk factors for adenocarcinoma of the lung. *Am J Epidemiol* 1987; 125: 25-34.
63. Buffler P, Pickle L, Mason T, Contant C. The causes of lung cancer in Texas. *Lung Cancer Causes and Prevention*. New York: Verlag Chemie 1984.
64. Butler T. The relationship of passive smoking to various health outcomes among Seventh day Adventists in California. Thesis University of California, Los Angeles 1988.
65. Chan WC, Colbourne MJ, Fung SC, Ho HC. Bronchial cancer in Hong Kong 1976-1977. *Br J Cancer* 1979; 39: 182-192.
66. Chan W, Fung S. Lung cancer in non-smokers in Hong Kong. *Cancer Campaign* 1982; 6.

67. Chen W. A cohort study on risk factors of lung cancer among non-smoking women in urban Shanghai [Master]. Fudan University 2009.
68. Chiou HL, Wu MF, Chien WP et al. NAT2 fast acetylator genotype is associated with an increased risk of lung cancer among never-smoking women in Taiwan. *Cancer Lett* 2005; 223: 93-101.
69. Choi S-Y, Lee K-H, Lee T-O. A case-control study on risk factors in lung cancer. *Korean J Epidemiology* 1989; 11: 66-80.
70. Correa P, Pichler LW, Trontham E et al. *Lung Cancer Causes and Prevention*. 1984.
71. Dai WC, Wang SY, Chen Y. [Fraction analysis of the involvement of multiple risk factors in the etiology of lung cancer: risk factor interactions in a case-control study for lung cancer in females]. *Zhonghua Liu Xing Bing Xue Za Zhi* 1997; 18: 341-344.
72. de Andrade M, Ebbert JO, Wampfler JA et al. Environmental tobacco smoke exposure in women with lung cancer. *Lung Cancer* 2004; 43: 127-134.
73. Du Y, Cha Q, Chen Y, Wu J. Exposure to environmental tobacco smoke and female lung cancer in Guangzhou, China. *Proc Indoor Air* 1993; 1: 511-516.
74. Du Y, Cha Q, Chen X et al. Exposure to environmental tobacco smoke and female lung cancer. *Indoor Air-International Journal Of Indoor Air Quality And Climate*. 1995; 5: 231-236.
75. Fang J, Gan DK, Zheng SH, Zhang HW. [A case-control study of the risk factors for lung cancer among Chinese women who have never smoked]. *Wei Sheng Yan Jiu* 2006; 35: 464-467.
76. Franco-Marina F, Villalba Caloca J, Corcho-Berdugo A, Grupo Interinstitucional de Cancer P. Role of active and passive smoking on lung cancer etiology in Mexico City. *Salud Publica Mex* 2006; 48 Suppl 1: S75-82.
77. Garfinkel L, Auerbach O, Joubert L. Involuntary smoking and lung cancer: a case-control study. *J Natl Cancer Inst* 1985; 75: 463-469.
78. Geng G, Liang Z, Zhang A, Wu G. On the relationship between smoking and female lung cancer. *Smoking and Health* 1987. Amsterdam, New York: Elsevier Science, 1988.
79. Ger LP, Hsu WL, Chen KT, Chen CJ. Risk factors of lung cancer by histological category in Taiwan. *Anticancer Res* 1993; 13: 1491-1500.
80. Gillis CR, Hole DJ, Hawthorne VM, Boyle P. The effect of environmental tobacco smoke in two urban communities in the west of Scotland. *Eur J Respir Dis Suppl* 1984; 133: 121-126.
81. Guan D, Liu W, Ding S. A case-control study on risk factors of lung cancer in non-smoking women in Shenyang city from 2015 to 2018. *J Prev Med Inf* 2020; 36: 351-355.
82. He QQ, Wong TW, Du L et al. Environmental tobacco smoke exposure and Chinese schoolchildren's respiratory health: a prospective cohort study. *Am J Prev Med* 2011; 41: 487-493.
83. Hirayama T. Passive smoking and lung cancer. *Br Med J* 1981; 282: 1394.
84. Hirayama T. Passive smoking and lung cancer: consistency of association. *Lancet* 1983; 2: 1425-1426.

85. Hirayama T. Lung cancer in Japan: Effects of nutrition and passive smoking. Verlag Chemie International 1984; 175-195.
86. Hirayama T. Lung Cancer: Causes and Prevention. 1984.
87. Hirayama T. Passive smoking and cancer; an epidemiologic review. Changing cancer patterns and topics in cancer epidemiology. Gann Monograph on Cancer Research 1987; 33: 127-135.
88. Hirayama T. [A large scale cohort study on the effect of life styles on the risk of cancer by each site]. Gan No Rinsho 1990; Spec No: 233-242.
89. Hosgood HD, 3rd, Chapman RS, Wei H et al. Coal mining is associated with lung cancer risk in Xuanwei, China. Am J Ind Med 2012; 55: 5-10.
90. Huang M, Chen X, YF. Q. Study on influencing factors and their interactions for lung cancer. Chinese Journal of Disease Control & Prevention 2011; 15: 91-94.
91. Humble CG, Samet JM, Pathak DR. Marriage to a smoker and lung cancer risk. Am J Public Health 1987; 77: 598-602.
92. Inoue R, Hirayama T. Passive smoking and lung cancer in women. Smoking and Health 1987. Amsterdam: Elsevier Science Publishers BV 1988; 283–285.
93. Izumi S, Imai K, Nakachi K. Excess concordance of cancer incidence and lifestyles in married couples (Japan): survival analysis of paired rate data. Cancer Causes Control 2004; 15: 551-558.
94. Jang JS, Lee A, Li J et al. Common Oncogene Mutations and Novel SND1-BRAF Transcript Fusion in Lung Adenocarcinoma from Never Smokers. Sci Rep 2015; 5: 9755.
95. Jee SH, Samet JM, Ohrr H et al. Smoking and cancer risk in Korean men and women. Cancer Causes Control 2004; 15: 341-348.
96. Jiang T, Song H, Peng X et al. [A case-control study on non-smoking primary lung cancers in Sichuan, China]. Zhongguo Fei Ai Za Zhi 2010; 13: 511-516.
97. Jin G, Xu L, Shu Y et al. Common genetic variants on 5p15.33 contribute to risk of lung adenocarcinoma in a Chinese population. Carcinogenesis 2009; 30: 987-990.
98. Jo UH, Han SG, Seo JH et al. The genetic polymorphisms of HER-2 and the risk of lung cancer in a Korean population. BMC Cancer 2008; 8: 359.
99. Jockel K-H. Passive smoking—evaluation of the epidemiological findings. Dusseldorf: Verein Deutscher Ingenieure 1991.
100. Jou YS, Lo YL, Hsiao CF et al. Association of an EGFR intron 1 SNP with never-smoking female lung adenocarcinoma patients. Lung Cancer 2009; 64: 251-256.
101. Kabat GC, Wynder EL. Lung cancer in nonsmokers. Cancer 1984; 53: 1214-1221.
102. Kabat G. Epidemiologic studies of the relationship between passive smoking and lung cancer. Presentation on the American health foundation study. Washington: Toxicology Forum. 1990; 187-199.

103. Katada H, Mikami R, Konishi M et al. [The effects of passive smoking in the development of female lung cancer in the Nara district]. *Jpn J Cancer Clin* 1998; 34: 21-27.
104. Kim C, Chapman RS, Hu W et al. Smoky coal, tobacco smoking, and lung cancer risk in Xuanwei, China. *Lung Cancer* 2014; 84: 31-35.
105. Kiyohara C, Wakai K, Mikami H et al. Risk modification by CYP1A1 and GSTM1 polymorphisms in the association of environmental tobacco smoke and lung cancer: a case-control study in Japanese nonsmoking women. *Int J Cancer* 2003; 107: 139-144.
106. Kiyohara C, Horiuchi T, Takayama K, Nakanishi Y. IL1B rs1143634 polymorphism, cigarette smoking, alcohol use, and lung cancer risk in a Japanese population. *J Thorac Oncol* 2010; 5: 299-304.
107. Kleinerman R, Wang Z, Lubin J et al. Lung cancer and indoor air pollution in rural china. *Ann Epidemiol* 2000; 10: 469.
108. Kleinerman RA, Wang Z, Wang L et al. Lung cancer and indoor exposure to coal and biomass in rural China. *J Occup Environ Med* 2002; 44: 338-344.
109. Ko YC, Cheng LS, Lee CH et al. Chinese food cooking and lung cancer in women nonsmokers. *Am J Epidemiol* 2000; 151: 140-147.
110. Koo L, Ho J, Saw D. Active and passive smoking among female lung cancer patients and controls in Hong Kong. *Exp Clin Cancer Res* 1983; 4: 367-375.
111. Koo L, Ho J, Saw D. Is passive smoking an added risk factor for lung cancer in Chinese women? *Exp Clin Cancer Res*. 1984; 3: 277-284.
112. Koo LC, Ho JH, Lee N. An analysis of some risk factors for lung cancer in Hong Kong. *Int J Cancer* 1985; 35: 149-155.
113. Lam W. A clinical and epidemiological study of carcinoma of lung in Hong Kong. Thesis University of Hong Kong 1985.
114. Lam T, Cheng K. Passive smoking is a risk factor for lung cancer in never smoking women in Hong Kong. *Smoking and health*, 1987. 1988.
115. Lan Q, He X. Molecular epidemiological studies on the relationship between indoor coal burning and lung cancer in Xuan Wei, China. *Toxicology* 2004; 198: 301-305.
116. Lan Q, He X, Shen M et al. Variation in lung cancer risk by smoky coal subtype in Xuanwei, China. *Int J Cancer* 2008; 123: 2164-2169.
117. Layard M. Ischemic Heart Disease and Spousal Smoking in the National Mortality Followback Survey. *Regulation Toxicology and pharmacology* 1995; 21: 180-183.
118. Lee PN. *Lung Cancer, Causes and Prevention*. 1984.
119. Lee P. *Misclassification of smoking habits and passive smoking: a Review of the evidence*. Springer, Berlin Heidelberg New York 1988.
120. Lee YJ, Cho BC, Jee SH et al. Impact of environmental tobacco smoke on the incidence of mutations in epidermal growth factor receptor gene in never-smoker patients with non-small-cell lung cancer. *J Clin Oncol* 2010; 28: 487-492.

121. Li L, Wang Q, Rao K. A case-control study of risk factors for lung cancer in Beijing. *Bull Chin Cancer* 2000; 9: 83-85.
122. Li M, Yin Z, Cui Z et al. [Association of genetic polymorphism in DNA repair gene XRCC1 with risk of lung adenocarcinoma in nonsmoking women]. *Zhongguo Fei Ai Za Zhi* 2005; 8: 431-434.
123. Li X, Guan P, Yin Z. Relationship between HPV infection and lung cancer in nonsmoking female. *Chinese Journal of Public Health*. 2008; 513-515.
124. Li Y, Sheu CC, Ye Y et al. Genetic variants and risk of lung cancer in never smokers: a genome-wide association study. *Lancet Oncol* 2010; 11: 321-330.
125. Li S. Analysis the risk factor of lung cancer in female. *Chin J Lab Diagn* 2011; 10: 1767-1769.
126. Li H, Wang B. Clinical characteristics of young lung cancer patients and factors relevant to its onset. *Pract Prev Med* 2020; 27: 699-703.
127. Liang H, Guan P, Yin Z et al. Risk of lung cancer following nonmalignant respiratory conditions among nonsmoking women living in Shenyang, Northeast China. *J Womens Health (Larchmt)* 2009; 18: 1989-1995.
128. Liang HY, Li XL, Yu XS et al. Facts and fiction of the relationship between preexisting tuberculosis and lung cancer risk: a systematic review. *Int J Cancer* 2009; 125: 2936-2944.
129. Lin C, Sun X, Lin Y. Passive smoking and lung cancer in non-smoking women. *Pract Oncol J* 1994; 8: 13-15.
130. Lin C, Sun X, Lin Y et al. Indoor air pollution and lung adenocarcinoma among non-smoking female. *Cancer Res Prev Treat* 1996; 23: 47-50.
131. Lin Y, Chen X, Huang M et al. A case-control study of risk factors for female lung cancer. *J Fujian Med Univ* 2010; 44: 239-243.
132. Liu Z. [A case-control study of lung cancer risk factors in Xuanwei]. *Zhonghua Liu Xing Bing Xue Za Zhi* 1990; 11: 79-83.
133. Liu E, Xiang Y, Jin F, Gao Y. Risk factors for lung cancer among nonsmoking females in urban Shanghai: A population-based case-control study. *Tumor* 2001; 21: 421-425.
134. Liu X, Qian M, Zou H, Chen D. Case-control study on risk factors of lung cancer in non-smoking women. *Chinese Primary Health Care*. 2010; 24: 64-65.
135. Liu Z. A case-control study on smoking, passive smoking and the risk of lung cancer. *Chin J of Disease Control* 2015; 19: 145-149.
136. Luo RX, Wu B, Yi YN et al. Indoor burning coal air pollution and lung cancer--a case-control study in Fuzhou, China. *Lung Cancer* 1996; 14 Suppl 1: S113-119.
137. Lv J, Zhu J, Wang Y et al. The Risk factors of human lung cancer with 445 paired cases and controls. *Pract Prev Med* 2003; 10: 275-279.
138. Ma J, Hou Y, Long F. Case-control study on risk factors for lung cancer among nonsmokers in Baoding. *J Med Pest Control* 2021; 37: 187-190.



139. Mu L, Su J, Yu S. The control of lung cancer relating to quitting active smoking and secondary smoking: a case-control study of lung cancer in Taiyuan. *China Oncol* 2021; 31: 335-343.
140. Pan J. A case-control study on risk factors of lung cancer among non-smoking women. *Zhejiang Pre Med* 2014; 26: 772–782.
141. Pan JL, Gao J, Hou JH et al. Interaction Between Environmental Risk Factors and Catechol-O-Methyltransferase (COMT) and X-Ray Repair Cross-Complementing Protein 1 (XRCC1) Gene Polymorphisms in Risk of Lung Cancer Among Non-Smoking Chinese Women: A Case-Control Study. *Med Sci Monit* 2018; 24: 5689-5697.
142. Phukan RK, Saikia BJ, Borah PK et al. Role of household exposure, dietary habits and glutathione S-Transferases M1, T1 polymorphisms in susceptibility to lung cancer among women in Mizoram India. *Asian Pac J Cancer Prev* 2014; 15: 3253-3260.
143. Ren Y, Yin Z, Li K et al. TGFbeta-1 and TGFBR2 polymorphisms, cooking oil fume exposure and risk of lung adenocarcinoma in Chinese nonsmoking females: a case control study. *BMC Med Genet* 2015; 16: 22.
144. Reynolds P, von Behren J, Fontham ET et al. Occupational exposure to environmental tobacco smoke. *JAMA* 1996; 275: 441-442.
145. Sandler DP, Everson RB, Wilcox AJ. Passive smoking in adulthood and cancer risk. *Am J Epidemiol* 1985; 121: 37-48.
146. Sandler DP, Wilcox AJ, Everson RB. Cumulative effects of lifetime passive smoking on cancer risk. *Lancet* 1985; 1: 312-315.
147. Schwartz AG, Wenzlaff AS, Prysak GM et al. Reproductive factors, hormone use, estrogen receptor expression and risk of non small-cell lung cancer in women. *J Clin Oncol* 2007; 25: 5785-5792.
148. Seow A, Poh WT, Teh M et al. Diet, reproductive factors and lung cancer risk among Chinese women in Singapore: evidence for a protective effect of soy in nonsmokers. *Int J Cancer* 2002; 97: 365-371.
149. Shen XB, Wang GX, Huang YZ et al. Analysis and estimates of attributable risk factors for lung cancer in Nanjing, China. *Lung Cancer* 1996; 14 Suppl 1: S107-112.
150. Shen L, Yin Z, Wu W et al. Single nucleotide polymorphism in ATM gene, cooking oil fumes and lung adenocarcinoma susceptibility in Chinese female non-smokers: a case-control study. *PLoS One* 2014; 9: e96911.
151. Shi H, He Q, Dai X, Zhou B. [Study on risk factors of lung cancer in non-smoking women]. *Zhongguo Fei Ai Za Zhi* 2005; 8: 279-282.
152. Shi H. The etiological study on lung cancer in non-smoking women [Doctor]. China Medical University 2006.
153. Shimizu H, Morishita M, Mizuno K et al. A case-control study of lung cancer in nonsmoking women. *Tohoku J Exp Med* 1988; 154: 389-397.
154. Shiraishi K, Kohno T, Kunitoh H et al. Contribution of nicotine acetylcholine receptor polymorphisms to lung cancer risk in a smoking-independent manner in the Japanese. *Carcinogenesis* 2009; 30: 65-70.

155. Sobue T, Suzuki T, Nakayama N et al. [Association of indoor air pollution and passive smoking with lung cancer in Osaka, Japan]. *Gan No Rinsho* 1990; Spec No: 329-333.
156. Song L, Yan W, Dai X. Indoor air pollution and women lung cancer. *J. Environ. Health* 1999; 16: 201–202.
157. Su J, Mu L, Yu S et al. The case–control study of lung cancer in Taiyuan, China. *Tumor* 2013; 33: 884-890.
158. Sun X, Lin C, Dai X. A study of relationship between environmental tobacco smoking and lung cancer in females. *Tumor* 1995; 15: 185-196.
159. Sun X-W, Dai X-D, Lin C-Y et al. Passive smoking and lung cancer among nonsmoking women in Harbin, China. International symposium on lifestyle factors and human lung cancer, China 1994. *Lung Cancer* 1996; 14: 237.
160. Trichopoulos D, Kalandidi A, Sparros L. Lung cancer and passive smoking: conclusion of Greek study. *Lancet* 1983; 2: 677-678.
161. Tse LA, Yu IT, Qiu H et al. A case-referent study of lung cancer and incense smoke, smoking, and residential radon in Chinese men. *Environ Health Perspect* 2011; 119: 1641-1646.
162. Varela L. Assessment of the Association Between Passive Smoking and Lung Cancer. Ph.D. thesis. Yale University 1987.
163. Wang T, Zhou B. (Abstract) Lung cancer in nonsmoking Chinese women. *Shanghai Tumor* 1995; 15: 183-184.
164. Wang T, Zhou B, Shi J, Yu S. Case–control study on risk factors associated with lung cancer among non-smoking women in Shengyang. *Chin J Public Health* 1996; 15: 257-259.
165. Wang F, Edgar J, Dai X. A case-control study of childhood and adolescent exposure to environment tobacco smoke (ETS) and the risk of female lung cancer. *Lung Cancer* 1996; 14: 238.
166. Wang L, Lubin J, Zhang S. Lung cancer and environmental tobacco smoke in non-industrial area of China. *China Preventive Medicine*. 2002; 5-9.
167. Wenzlaff AS, Cote ML, Bock CH et al. CYP1A1 and CYP1B1 polymorphisms and risk of lung cancer among never smokers: a population-based study. *Carcinogenesis* 2005; 26: 2207-2212.
168. Wenzlaff AS, Cote ML, Bock CH et al. GSTM1, GSTT1 and GSTP1 polymorphisms, environmental tobacco smoke exposure and risk of lung cancer among never smokers: a population-based study. *Carcinogenesis* 2005; 26: 395-401.
169. Wu C, Hu Z, Yu D et al. Genetic variants on chromosome 15q25 associated with lung cancer risk in Chinese populations. *Cancer Res* 2009; 69: 5065-5072.
170. Wu-Williams AH, Samet JM. Environmental tobacco smoke: exposure-response relationships in epidemiologic studies. *Risk Anal* 1990; 10: 39-48.
171. Xiang Y, Gao Y. A population-based case-control study of lung cancer between young and older nonsmoking women in urban Shanghai. *Tumor*. 2003; 452-457.

172. Xu ZY, Blot WJ, Xiao HP et al. Smoking, air pollution, and the high rates of lung cancer in Shenyang, China. *J Natl Cancer Inst* 1989; 81: 1800-1806.
173. Xu LL, Wain JC, Miller DP et al. The NAD(P)H:quinone oxidoreductase 1 gene polymorphism and lung cancer: differential susceptibility based on smoking behavior. *Cancer Epidemiol Biomarkers Prev* 2001; 10: 303-309.
174. Xue X, Yin Z, Lu Y et al. The joint effect of hOGG1, APE1, and ADPRT polymorphisms and cooking oil fumes on the risk of lung adenocarcinoma in Chinese non-smoking females. *PLoS One* 2013; 8: e71157.
175. Yoon KA, Kim JH, Gil HJ et al. CYP1B1, CYP1A1, MPO, and GSTP1 polymorphisms and lung cancer risk in never-smoking Korean women. *Lung Cancer* 2008; 60: 40-46.
176. Yu Z, Li K, Lu B et al. Environmental factors and lung cancer. *Lung Cancer* 1996; 14: 240-241.
177. Yu S, Chen X, Wang Y, Pang L. Case-control study of 612 cases of non-smoking female primary lung cancer in Shenyang. *Chinese Practical Journal of Rural Doctor* 2015; 22: 38-41.
178. Zaridze D, Zemlyanaya G. Indoor air pollution and lung cancer risk in non-smoking women in Moscow. *Exp Oncol* 1994; 16: 441-445.
179. Zaridze DG, Zemlianaia GM, Aitakov ZN. [Role of outdoor and indoor air pollution in the etiology of lung cancer]. *Vestn Ross Akad Med Nauk* 1995; 6-10.
180. Zaridze D, Maximovitch D, Zemlyanaya G et al. Exposure to environmental tobacco smoke and risk of lung cancer in non-smoking women from Moscow, Russia. *Int J Cancer* 1998; 75: 335-338.
181. Zhao H, Hu J, Li Y et al. A case-control study for the risk factors of primary lung cancer in Guangzhou. *Chin J Dis Control Prev* 2013; 17: 103-105.
182. Zheng S, Fan R, Wu Z. [Studies on relationship between passive smoking and lung cancer in non-smoking women]. *Zhonghua Yu Fang Yi Xue Za Zhi* 1997; 31: 163-165.
183. Zhong L, Gao Y, Jin F et al. The association of cooking air pollution and lung cancer risk: Results from a case-control study in nonsmoking women in Shanghai. *Tumor* 1995; 15: 313-317.
184. Zhou B, Wang T, Zhang Q, Guan P. The risk factors of female lung adenocarcinoma. *China Public Health* 2000; 16: 536-539.
185. Ziegler RG, Mason TJ, Stemhagen A et al. Dietary carotene and vitamin A and risk of lung cancer among white men in New Jersey. *J Natl Cancer Inst* 1984; 73: 1429-1435.
186. Chuang SC, Gallo V, Michaud D et al. Exposure to environmental tobacco smoke in childhood and incidence of cancer in adulthood in never smokers in the European Prospective Investigation into Cancer and Nutrition. *Cancer Causes Control* 2011; 22: 487-494.
187. Vineis P, Hoek G, Krzyzanowski M et al. Lung cancers attributable to environmental tobacco smoke and air pollution in non-smokers in different European countries: a prospective study. *Environ Health* 2007; 6: 7.

188. Fang X, Yin Z, Li X et al. Polymorphisms in GEMIN4 and AGO1 Genes Are Associated with the Risk of Lung Cancer: A Case-Control Study in Chinese Female Non-Smokers. *Int J Environ Res Public Health* 2016; 13.
189. Qu R, Li X, Quan X et al. Polymorphism in CYP24A1 Is Associated with Lung Cancer Risk: A Case-Control Study in Chinese Female Nonsmokers. *DNA Cell Biol* 2019; 38: 243-249.
190. Ren YW, Yin ZH, Wan Y et al. P53 Arg72Pro and MDM2 SNP309 polymorphisms cooperate to increase lung adenocarcinoma risk in Chinese female non-smokers: a case control study. *Asian Pac J Cancer Prev* 2013; 14: 5415-5420.
191. Fontham ET, Correa P, WuWilliams A et al. Lung cancer in nonsmoking women: a multicenter case-control study. *Cancer Epidemiol Biomarkers Prev* 1991; 1: 35-43.
192. Fontham ET, Correa P, Reynolds P et al. Environmental tobacco smoke and lung cancer in nonsmoking women. A multicenter study. *JAMA* 1994; 271: 1752-1759.
193. Fowke JH, Gao YT, Chow WH et al. Urinary isothiocyanate levels and lung cancer risk among non-smoking women: a prospective investigation. *Lung Cancer* 2011; 73: 18-24.
194. Weiss JM, Lacey JV, Jr., Shu XO et al. Menstrual and reproductive factors in association with lung cancer in female lifetime nonsmokers. *Am J Epidemiol* 2008; 168: 1319-1325.
195. Garfinkel L. Time trends in lung cancer mortality among nonsmokers and a note on passive smoking. *J Natl Cancer Inst* 1981; 66: 1061-1066.
196. Enstrom JE, Kabat GC. Environmental tobacco smoke and tobacco related mortality in a prospective study of Californians, 1960-98. *BMJ* 2003; 326: 1057.
197. Gorlova OY, Weng SF, Zhang Y et al. DNA repair capacity and lung cancer risk in never smokers. *Cancer Epidemiol Biomarkers Prev* 2008; 17: 1322-1328.
198. Spitz MR, Gorlov IP, Amos CI et al. Variants in inflammation genes are implicated in risk of lung cancer in never smokers exposed to second-hand smoke. *Cancer Discov* 2011; 1: 420-429.
199. Gorlova OY, Weng SF, Hernandez L et al. Dietary patterns affect lung cancer risk in never smokers. *Nutr Cancer* 2011; 63: 842-849.
200. He F, Xie JX, Liu CL et al. The relationship of lung cancer with menstrual and reproductive factors may be influenced by passive smoking, cooking oil fumes, and tea intake: A case-control study in Chinese women. *Medicine (Baltimore)* 2017; 96: e8816.
201. Zhuang J, Liu Z, Xiao R et al. Association between smoking and environmental tobacco smoke with lung cancer risk: a case-control study in the Fujian Chinese population. *Journal of Public Health (Germany)* 2022; 30: 2047-2057.
202. Hirayama T. Non-smoking wives of heavy smokers have a higher risk of lung cancer: a study from Japan. *Br Med J (Clin Res Ed)* 1981; 282: 183-185.
203. Hirayama T. Cancer mortality in nonsmoking women with smoking husbands based on a large-scale cohort study in Japan. *Prev Med* 1984; 13: 680-690.
204. Hosseini M, Naghan PA, Karimi S et al. Environmental risk factors for lung cancer in Iran: a case-control study. *Int J Epidemiol* 2009; 38: 989-996.

205. Masjedi MR, Naghan PA, Taslimi S et al. Opium could be considered an independent risk factor for lung cancer: a case-control study. *Respiration* 2013; 85: 112-118.
206. Kabat GC. Aspects of the epidemiology of lung cancer in smokers and nonsmokers in the United States. *Lung Cancer* 1996; 15: 1-20.
207. Kabat GC, Stellman SD, Wynder EL. Relation between exposure to environmental tobacco smoke and lung cancer in lifetime nonsmokers. *Am J Epidemiol* 1995; 142: 141-148.
208. Ko YC, Lee CH, Chen MJ et al. Risk factors for primary lung cancer among non-smoking women in Taiwan. *Int J Epidemiol* 1997; 26: 24-31.
209. Lee CH, Ko YC, Goggins W et al. Lifetime environmental exposure to tobacco smoke and primary lung cancer of non-smoking Taiwanese women. *Int J Epidemiol* 2000; 29: 224-231.
210. Kreuzer M, Heinrich J, Kreienbrock L et al. Risk factors for lung cancer among nonsmoking women. *Int J Cancer* 2002; 100: 706-713.
211. Kreuzer M, Krauss M, Kreienbrock L et al. Environmental tobacco smoke and lung cancer: a case-control study in Germany. *Am J Epidemiol* 2000; 151: 241-250.
212. Kubik A, Zatloukal P, Boyle P et al. A case-control study of lung cancer among Czech women. *Lung Cancer* 2001; 31: 111-122.
213. Zatloukal P, Kubik A, Pauk N et al. Adenocarcinoma of the lung among women: risk associated with smoking, prior lung disease, diet and menstrual and pregnancy history. *Lung Cancer* 2003; 41: 283-293.
214. Kubik AK, Zatloukal P, Tomasek L, Petruzela L. Lung cancer risk among Czech women: a case-control study. *Prev Med* 2002; 34: 436-444.
215. Lo YL, Hsiao CF, Jou YS et al. ATM polymorphisms and risk of lung cancer among never smokers. *Lung Cancer* 2010; 69: 148-154.
216. Lo YL, Hsiao CF, Chang GC et al. Risk factors for primary lung cancer among never smokers by gender in a matched case-control study. *Cancer Causes Control* 2013; 24: 567-576.
217. Lo YL, Hsiao CF, Jou YS et al. Polymorphisms of MLH1 and MSH2 genes and the risk of lung cancer among never smokers. *Lung Cancer* 2011; 72: 280-286.
218. Nyberg F, Agudo A, Boffetta P et al. A European validation study of smoking and environmental tobacco smoke exposure in nonsmoking lung cancer cases and controls. *Cancer Causes Control* 1998; 9: 173-182.
219. Boffetta P, Agudo A, Ahrens W et al. Multicenter case-control study of exposure to environmental tobacco smoke and lung cancer in Europe. *J Natl Cancer Inst* 1998; 90: 1440-1450.
220. Olivo-Marston SE, Yang P, Mechanic LE et al. Childhood exposure to secondhand smoke and functional mannose binding lectin polymorphisms are associated with increased lung cancer risk. *Cancer Epidemiol Biomarkers Prev* 2009; 18: 3375-3383.
221. Schwartz AG, Yang P, Swanson GM. Familial risk of lung cancer among nonsmokers and their relatives. *Am J Epidemiol* 1996; 144: 554-562.

222. Torres-Durán M, Ruano-Ravina A, Parente-Lamelas I et al. Alpha-1 Antitrypsin Deficiency and Lung Cancer Risk: A Case-Control Study in Never-Smokers. *J Thorac Oncol* 2015; 10: 1279-1284.
223. Tubío-Pérez RA, Torres-Durán M, García-Rodríguez ME et al. Alpha-1 antitrypsin deficiency and risk of lung cancer in never-smokers: a multicentre case-control study. *BMC Cancer* 2022; 22: 81.
224. Trichopoulos D, Kalandidi A, Sparros L, MacMahon B. Lung cancer and passive smoking. *Int J Cancer* 1981; 27: 1-4.
225. Kalandidi A, Katsouyanni K, Voropoulou N et al. Passive smoking and diet in the etiology of lung cancer among non-smokers. *Cancer Causes Control* 1990; 1: 15-21.
226. Vineis P, Airoldi L, Veglia F et al. Environmental tobacco smoke and risk of respiratory cancer and chronic obstructive pulmonary disease in former smokers and never smokers in the EPIC prospective study. *BMJ* 2005; 330: 277.
227. Wang FL, Love EJ, Liu N, Dai XD. Childhood and adolescent passive smoking and the risk of female lung cancer. *Int J Epidemiol* 1994; 23: 223-230.
228. Wu-Williams AH, Dai XD, Blot W et al. Lung cancer among women in north-east China. *Br J Cancer* 1990; 62: 982-987.
229. Yang P, Sun Z, Krowka MJ et al. Alpha1-antitrypsin deficiency carriers, tobacco smoke, chronic obstructive pulmonary disease, and lung cancer risk. *Arch Intern Med* 2008; 168: 1097-1103.
230. Yang X, Li X, Quan X et al. Association Between Two Polymorphisms in the Promoter Region of miR-143/miR-145 and the Susceptibility of Lung Cancer in Northeast Chinese Nonsmoking Females. *DNA Cell Biol* 2019; 38: 814-823.
231. Yu IT, Chiu YL, Au JS et al. Dose-response relationship between cooking fumes exposures and lung cancer among Chinese nonsmoking women. *Cancer Res* 2006; 66: 4961-4967.
232. Wang XR, Chiu YL, Qiu H et al. The roles of smoking and cooking emissions in lung cancer risk among Chinese women in Hong Kong. *Ann Oncol* 2009; 20: 746-751.
233. Zhong L, Goldberg MS, Gao YT, Jin F. Lung cancer and indoor air pollution arising from Chinese-style cooking among nonsmoking women living in Shanghai, China. *Epidemiology* 1999; 10: 488-494.
234. Zhong L, Goldberg MS, Gao YT, Jin F. A case-control study of lung cancer and environmental tobacco smoke among nonsmoking women living in Shanghai, China. *Cancer Causes Control* 1999; 10: 607-616.
235. Akiba S, Kato H, Blot WJ. Passive smoking and lung cancer among Japanese women. *Cancer Res* 1986; 46: 4804-4807.
236. Al-Zoughool M, Pintos J, Richardson L et al. Exposure to environmental tobacco smoke (ETS) and risk of lung cancer in Montreal: a case-control study. *Environ Health* 2013; 12: 112.
237. Boffetta P, Ahrens W, Nyberg F et al. Exposure to environmental tobacco smoke and risk of adenocarcinoma of the lung. *Int J Cancer* 1999; 83: 635-639.

238. Brenner DR, Hung RJ, Tsao MS et al. Lung cancer risk in never-smokers: a population-based case-control study of epidemiologic risk factors. *BMC Cancer* 2010; 10: 285.
239. Brownson RC, Alavanja MC, Hock ET, Loy TS. Passive smoking and lung cancer in nonsmoking women. *Am J Public Health* 1992; 82: 1525-1530.
240. Chan-Yeung M, Koo LC, Ho JC et al. Risk factors associated with lung cancer in Hong Kong. *Lung Cancer* 2003; 40: 131-140.
241. Cheng ES, Chan KH, Weber M et al. Solid Fuel, Secondhand Smoke, and Lung Cancer Mortality: A Prospective Cohort of 323,794 Chinese Never-Smokers. *Am J Respir Crit Care Med* 2022; 206: 1153-1162.
242. Correa P, Pickle LW, Fontham E et al. Passive smoking and lung cancer. *Lancet* 1983; 2: 595-597.
243. Dalager NA, Pickle LW, Mason TJ et al. The relation of passive smoking to lung cancer. *Cancer Res* 1986; 46: 4808-4811.
244. Du YX, Cha Q, Chen XW et al. An epidemiological study of risk factors for lung cancer in Guangzhou, China. *Lung Cancer* 1996; 14 Suppl 1: S9-37.
245. Galeone C, Pelucchi C, La Vecchia C et al. Indoor air pollution from solid fuel use, chronic lung diseases and lung cancer in Harbin, Northeast China. *Eur J Cancer Prev* 2008; 17: 473-478.
246. Gallegos-Arreola MP, Figuera-Villanueva LE, Troyo-Sanroman R et al. CYP1A1 \*2B and \*4 polymorphisms are associated with lung cancer susceptibility in Mexican patients. *Int J Biol Markers* 2008; 23: 24-30.
247. Gao YT, Blot WJ, Zheng W et al. Lung cancer among Chinese women. *Int J Cancer* 1987; 40: 604-609.
248. Gorlova OY, Zhang Y, Schabath MB et al. Never smokers and lung cancer risk: a case-control study of epidemiological factors. *Int J Cancer* 2006; 118: 1798-1804.
249. Han L, Lee CK, Pang H et al. Genetic predisposition to lung adenocarcinoma among never-smoking Chinese with different epidermal growth factor receptor mutation status. *Lung Cancer* 2017; 114: 79-89.
250. Janerich DT, Thompson WD, Varela LR et al. Lung cancer and exposure to tobacco smoke in the household. *N Engl J Med* 1990; 323: 632-636.
251. Jockel KH, Pohlabeln H, Ahrens W, Krauss M. Environmental tobacco smoke and lung cancer. *Epidemiology* 1998; 9: 672-675.
252. Johnson KC, Hu J, Mao Y, Canadian Cancer Registries Epidemiology Research G. Lifetime residential and workplace exposure to environmental tobacco smoke and lung cancer in never-smoking women, Canada 1994-97. *Int J Cancer* 2001; 93: 902-906.
253. Koo LC, Ho JH, Saw D, Ho CY. Measurements of passive smoking and estimates of lung cancer risk among non-smoking Chinese females. *Int J Cancer* 1987; 39: 162-169.
254. Kreuzer M, Gerken M, Kreienbrock L et al. Lung cancer in lifetime nonsmoking men - results of a case-control study in Germany. *Br J Cancer* 2001; 84: 134-140.

255. Lam TH, Kung IT, Wong CM et al. Smoking, passive smoking and histological types in lung cancer in Hong Kong Chinese women. *Br J Cancer* 1987; 56: 673-678.
256. Lee PN, Chamberlain J, Alderson MR. Relationship of passive smoking to risk of lung cancer and other smoking-associated diseases. *Br J Cancer* 1986; 54: 97-105.
257. Lei YX, Cai WC, Chen YZ, Du YX. Some lifestyle factors in human lung cancer: a case-control study of 792 lung cancer cases. *Lung Cancer* 1996; 14 Suppl 1: S121-136.
258. Li W, Tse LA, Au JSK et al. Secondhand Smoke Enhances Lung Cancer Risk in Male Smokers: An Interaction. *Nicotine Tob Res* 2016; 18: 2057-2064.
259. Liang D, Wang J, Li D et al. Lung Cancer in Never-Smokers: A Multicenter Case-Control Study in North China. *Front Oncol* 2019; 9: 1354.
260. Lin Y, Cai L. Environmental and dietary factors and lung cancer risk among Chinese women: a case-control study in southeast China. *Nutr Cancer* 2012; 64: 508-514.
261. Liu Q, Sasco AJ, Riboli E, Hu MX. Indoor air pollution and lung cancer in Guangzhou, People's Republic of China. *Am J Epidemiol* 1993; 137: 145-154.
262. Liu ZY, He XZ, Chapman RS. Smoking and other risk factors for lung cancer in Xuanwei, China. *Int J Epidemiol* 1991; 20: 26-31.
263. Liu L, Liu X, Ma X et al. Analysis of the associations of indoor air pollution and tobacco use with morbidity of lung cancer in Xuanwei, China. *Sci Total Environ* 2020; 717: 135232.
264. Malats N, Camus-Radon AM, Nyberg F et al. Lung cancer risk in nonsmokers and GSTM1 and GSTT1 genetic polymorphism. *Cancer Epidemiol Biomarkers Prev* 2000; 9: 827-833.
265. McGhee SM, Ho SY, Schooling M et al. Mortality associated with passive smoking in Hong Kong. *BMJ* 2005; 330: 287-288.
266. Mu L, Liu L, Niu R et al. Indoor air pollution and risk of lung cancer among Chinese female non-smokers. *Cancer Causes Control* 2013; 24: 439-450.
267. Nyberg F, Agrenius V, Svartengren K et al. Environmental tobacco smoke and lung cancer in nonsmokers: does time since exposure play a role? *Epidemiology* 1998; 9: 301-308.
268. Rachtan J. Smoking, passive smoking and lung cancer cell types among women in Poland. *Lung Cancer* 2002; 35: 129-136.
269. Rapiti E, Jindal SK, Gupta D, Boffetta P. Passive smoking and lung cancer in Chandigarh, India. *Lung Cancer* 1999; 23: 183-189.
270. Seki T, Nishino Y, Tanji F et al. Cigarette smoking and lung cancer risk according to histologic type in Japanese men and women. *Cancer Sci* 2013; 104: 1515-1522.
271. Shen XB, Wang GX, Zhou BS. Relation of exposure to environmental tobacco smoke and pulmonary adenocarcinoma in non-smoking women: a case control study in Nanjing. *Oncol Rep* 1998; 5: 1221-1223.
272. Sobue T. Association of indoor air pollution and lifestyle with lung cancer in Osaka, Japan. *Int J Epidemiol* 1990; 19 Suppl 1: S62-66.



273. Stockwell HG, Goldman AL, Lyman GH et al. Environmental tobacco smoke and lung cancer risk in nonsmoking women. *J Natl Cancer Inst* 1992; 84: 1417-1422.
274. Svensson C, Pershagen G, Klominek J. Smoking and passive smoking in relation to lung cancer in women. *Acta Oncol* 1989; 28: 623-629.
275. Torres-Durán M, Ruano-Ravina A, Parente-Lamelas I et al. Lung cancer in never-smokers: a case-control study in a radon-prone area (Galicia, Spain). *Eur Respir J* 2014; 44: 994-1001.
276. Tse LA, Yu IT, Au JS et al. Environmental tobacco smoke and lung cancer among Chinese nonsmoking males: might adenocarcinoma be the culprit? *Am J Epidemiol* 2009; 169: 533-541.
277. Wang L, Lubin JH, Zhang SR et al. Lung cancer and environmental tobacco smoke in a non-industrial area of China. *Int J Cancer* 2000; 88: 139-145.
278. Wang TJ, Zhou BS, Shi JP. Lung cancer in nonsmoking Chinese women: a case-control study. *Lung Cancer* 1996; 14 Suppl 1: S93-98.
279. Wang SY, Hu YL, Wu YL et al. A comparative study of the risk factors for lung cancer in Guangdong, China. *Lung Cancer* 1996; 14 Suppl 1: S99-105.
280. Wu AH, Henderson BE, Pike MC, Yu MC. Smoking and other risk factors for lung cancer in women. *J Natl Cancer Inst* 1985; 74: 747-751.
281. Yang L, Lu X, Deng J et al. Risk factors shared by COPD and lung cancer and mediation effect of COPD: two center case-control studies. *Cancer Causes Control* 2015; 26: 11-24.
282. Yin ZH, Cui ZG, Ren YW et al. TP63 gene polymorphisms, cooking oil fume exposure and risk of lung adenocarcinoma in Chinese non-smoking females. *Asian Pac J Cancer Prev* 2014; 14: 6519-6522.
283. Yin Z, Cui Z, Ren Y et al. Genetic polymorphisms of TERT and CLPTM1L, cooking oil fume exposure, and risk of lung cancer: a case-control study in a Chinese non-smoking female population. *Med Oncol* 2014; 31: 114.
284. Zhou BS, Wang TJ, Guan P, Wu JM. Indoor air pollution and pulmonary adenocarcinoma among females: a case-control study in Shenyang, China. *Oncol Rep* 2000; 7: 1253-1259.
285. Abdel-Rahman O. Incidence and Mortality of Lung Cancer Among Never Smokers in Relationship to Secondhand Smoking: Findings From the PLCO Trial. *Clin Lung Cancer* 2020; 21: 415-420 e412.
286. Cardenas VM, Thun MJ, Austin H et al. Environmental tobacco smoke and lung cancer mortality in the American Cancer Society's Cancer Prevention Study. II. *Cancer Causes Control* 1997; 8: 57-64.
287. de Waard F, Kemmeren JM, van Ginkel LA, Stolker AA. Urinary cotinine and lung cancer risk in a female cohort. *Br J Cancer* 1995; 72: 784-787.
288. Erhunmwunsee L, Wing SE, Zou X et al. Neighborhood disadvantage and lung cancer risk in a national cohort of never smoking Black women. *Lung Cancer* 2022; 173: 21-27.
289. Hansen MS, Licaj I, Braaten T et al. The fraction of lung cancer attributable to smoking in the Norwegian Women and Cancer (NOWAC) Study. *Br J Cancer* 2021; 124: 658-662.

290. He Y, Jiang B, Li LS et al. Secondhand smoke exposure predicted COPD and other tobacco-related mortality in a 17-year cohort study in China. *Chest* 2012; 142: 909-918.
291. Hill SE, Blakely T, Kawachi I, Woodward A. Mortality among lifelong nonsmokers exposed to secondhand smoke at home: cohort data and sensitivity analyses. *Am J Epidemiol* 2007; 165: 530-540.
292. Hole DJ, Gillis CR, Chopra C, Hawthorne VM. Passive smoking and cardiorespiratory health in a general population in the west of Scotland. *BMJ* 1989; 299: 423-427.
293. Jee SH, Ohrr H, Kim IS. Effects of husbands' smoking on the incidence of lung cancer in Korean women. *Int J Epidemiol* 1999; 28: 824-828.
294. Kurahashi N, Inoue M, Liu Y et al. Passive smoking and lung cancer in Japanese non-smoking women: a prospective study. *Int J Cancer* 2008; 122: 653-657.
295. Li J, Xu HL, Yao BD et al. Environmental tobacco smoke and cancer risk, a prospective cohort study in a Chinese population. *Environ Res* 2020; 191: 110015.
296. Miller GH, Golish JA, Cox CE, Chacko DC. Women and lung cancer: a comparison of active and passive smokers with nonexposed nonsmokers. *Cancer Detect Prev* 1994; 18: 421-430.
297. Nishino Y, Tsubono Y, Tsuji I et al. Passive smoking at home and cancer risk: a population-based prospective study in Japanese nonsmoking women. *Cancer Causes Control* 2001; 12: 797-802.
298. Ozasa K, Japan Collaborative Cohort Study for Evaluation of C. Smoking and mortality in the Japan Collaborative Cohort Study for Evaluation of Cancer (JACC). *Asian Pac J Cancer Prev* 2007; 8 Suppl: 89-96.
299. Pershagen G, Hrubec Z, Svensson C. Passive smoking and lung cancer in Swedish women. *Am J Epidemiol* 1987; 125: 17-24.
300. Pirie K, Peto R, Green J et al. Lung cancer in never smokers in the UK Million Women Study. *Int J Cancer* 2016; 139: 347-354.
301. Speizer FE, Colditz GA, Hunter DJ et al. Prospective study of smoking, antioxidant intake, and lung cancer in middle-aged women (USA). *Cancer Causes Control* 1999; 10: 475-482.
302. Veglia F, Vineis P, Overvad K et al. Occupational exposures, environmental tobacco smoke, and lung cancer. *Epidemiology* 2007; 18: 769-775.
303. Wang A, Kubo J, Luo J et al. Active and passive smoking in relation to lung cancer incidence in the Women's Health Initiative Observational Study prospective cohort. *Ann Oncol* 2015; 26: 221-230.
304. Wen W, Shu XO, Gao YT et al. Environmental tobacco smoke and mortality in Chinese women who have never smoked: prospective cohort study. *BMJ* 2006; 333: 376.
305. Zhang Z, Li Z, Zhang X et al. Association between secondhand smoke and cancers in adults in the US population. *J Cancer Res Clin Oncol* 2022.
306. Al-Zoughool M, Pintos J, Richardson L et al. Exposure to environmental tobacco smoke (ETS) and risk of lung cancer in Montreal: a case-control study. *Environ Health* 2013; 12: 112.

307. Kurahashi N, Inoue M, Liu Y et al. Passive smoking and lung cancer in Japanese non-smoking women: a prospective study. *Int J Cancer* 2008; 122: 653-657.
